# Supplementary material for: Identification, synthesis and biological evaluation of pyrazine ring compounds from Talaromyces minioluteus (Penicillium minioluteum)
Source: Royal Society of Chemistry journal article supplement (doi:10.1039/d0qo01030h), 2020-01-01

## Supporting Information

### Identification, Synthesis and Biological Evaluation of Pyrazine Ring Compounds from *Talaromyces minioluteus* (*Penicillium minioluteum*)

Fengqing Wang,<sup>a,‡</sup> Mengsha Wei,<sup>a,‡</sup> Xueyan Duan,<sup>a,‡</sup> Xiaorui Liu,<sup>a</sup> Si Yao,<sup>a</sup> Jianping Wang,<sup>a</sup>  
Hucheng Zhu,<sup>a</sup> Chunmei Chen,<sup>a,\*</sup> Lianghu Gu,<sup>a,\*</sup> and Yonghui Zhang<sup>a,\*</sup>

<sup>a</sup>Hubei Key Laboratory of Natural Medicinal Chemistry and Resource Evaluation, School of Pharmacy,  
Tongji Medical College, Huazhong University of Science and Technology, Wuhan 430030, People's  
Republic of China

<sup>‡</sup>These authors contributed equally to this work.

Tel.: (86) 27-83692892

E-mail: zhangyh@mails.tjmu.edu.cn (Y. Zhang),

gulianghu@hust.edu.cn (L. Gu),

chenchunmei@hust.edu.cn (C. Chen)

## Table of Contents

|                                                                                           |    |
|-------------------------------------------------------------------------------------------|----|
| NMR, HRESIMS, IR spectra of natural compound <b>1</b> .....                               | 3  |
| NMR, HRESIMS, IR spectra of natural compound <b>2</b> .....                               | 6  |
| NMR, HRESIMS, IR spectra of natural compound <b>3</b> .....                               | 10 |
| <sup>1</sup> H and <sup>13</sup> C NMR spectra of four isomers of compound <b>4</b> ..... | 14 |
| NMR spectra of four isomers of compound <b>2</b> .....                                    | 18 |
| <sup>1</sup> H and <sup>13</sup> C NMR spectra of four isomers of compound <b>3</b> ..... | 30 |
| HPLC Traces of natural compound <b>2</b> and <b>3</b> .....                               | 34 |
| HPLC Traces of four isomers of compound <b>4, 2</b> and <b>3</b> .....                    | 35 |

Figure S1.  $^1\text{H}$  NMR spectra of **1** (400MHz,  $\text{CD}_3\text{OD}$ )

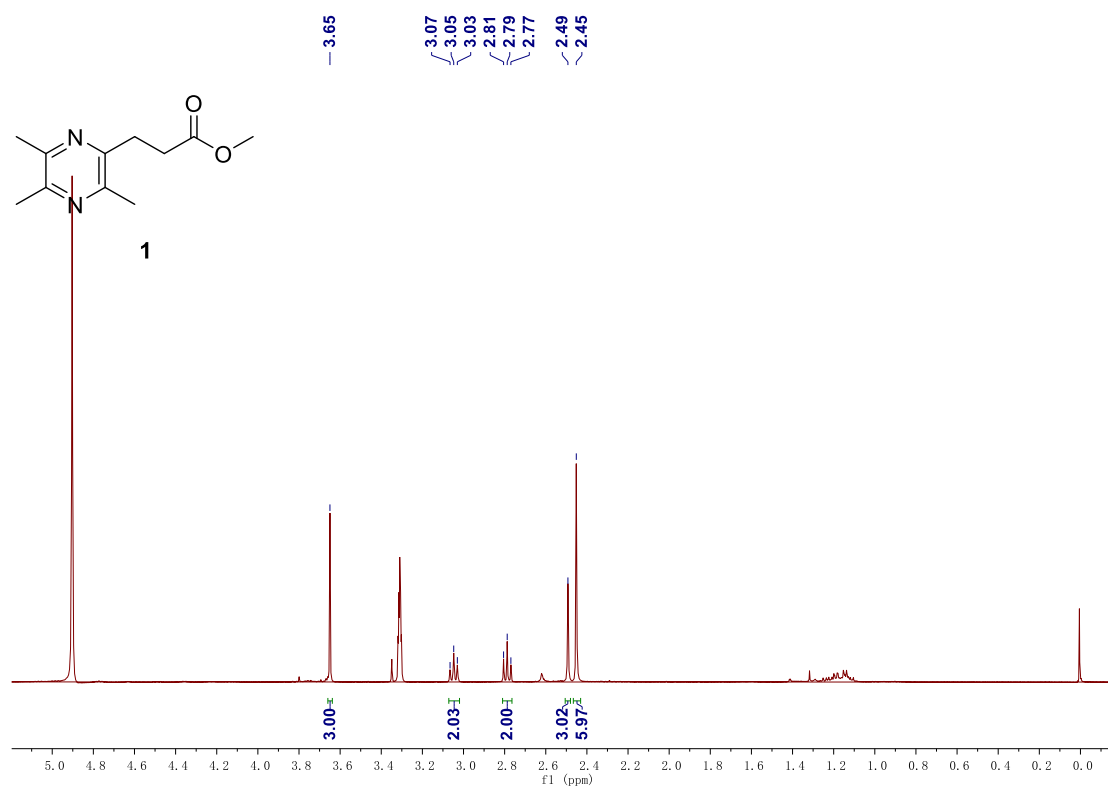

Figure S2.  $^{13}\text{C}$  NMR and DEPT NMR spectra of **1** (100MHz,  $\text{CD}_3\text{OD}$ )

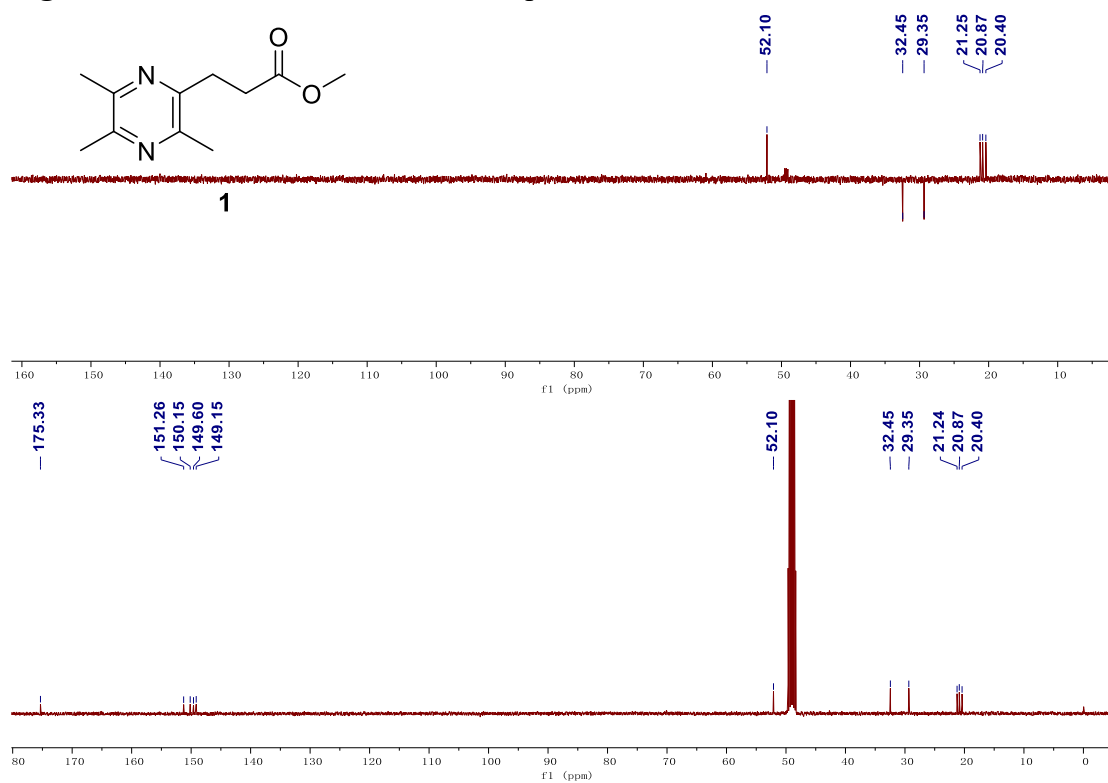

**Figure S3.** HSQC NMR spectra of **1** (CD<sub>3</sub>OD)

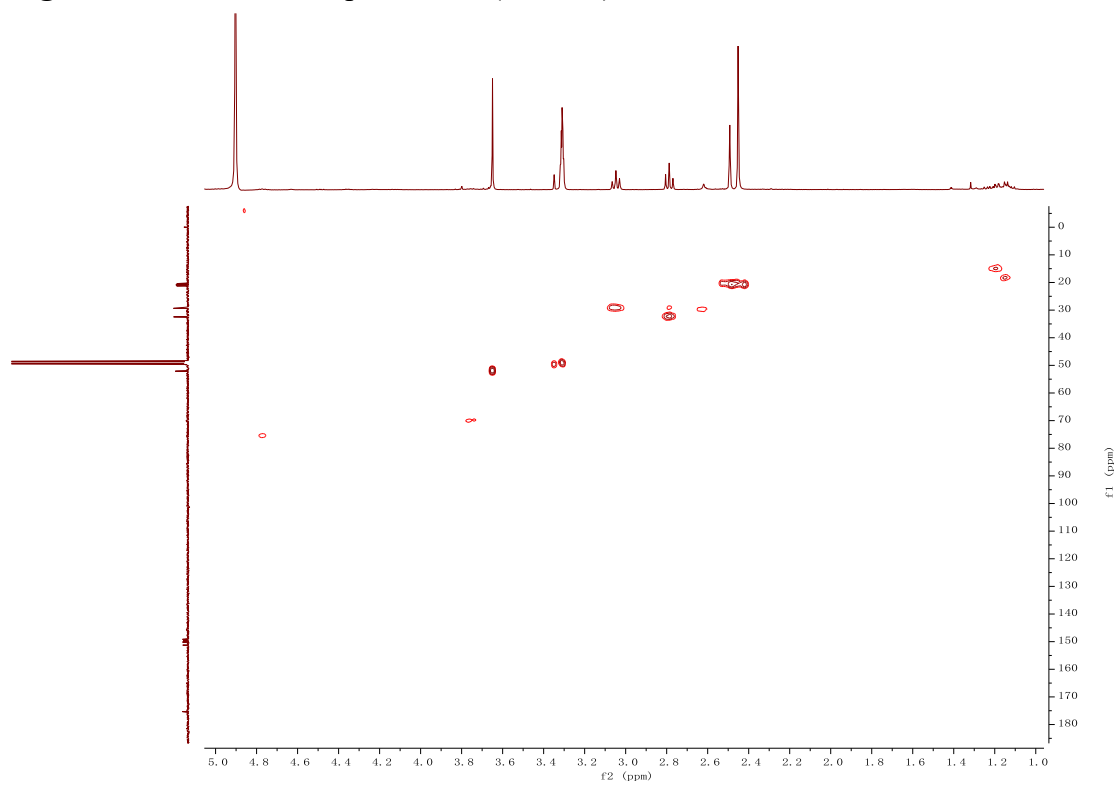

**Figure S4.** HMBC spectra of **1** (CD<sub>3</sub>OD)

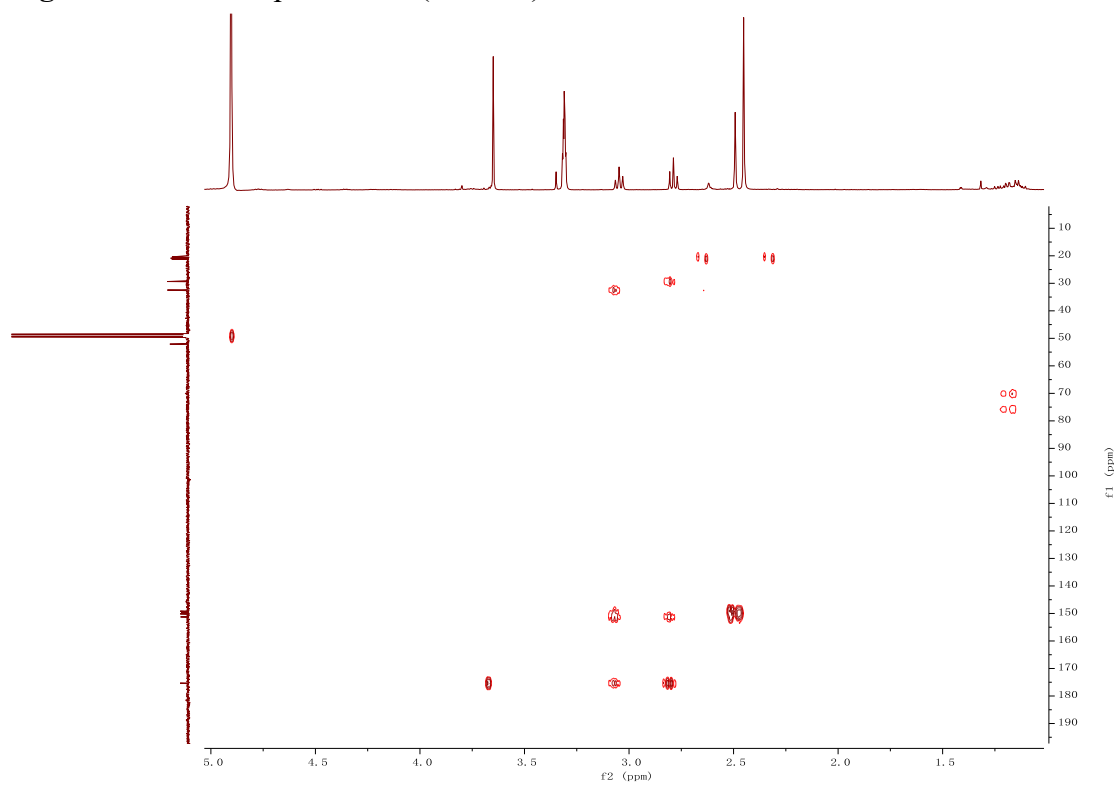

**Figure S5.**  $^1\text{H}$ - $^1\text{H}$  COSY spectra of **1** (100MHz,  $\text{CD}_3\text{OD}$ )

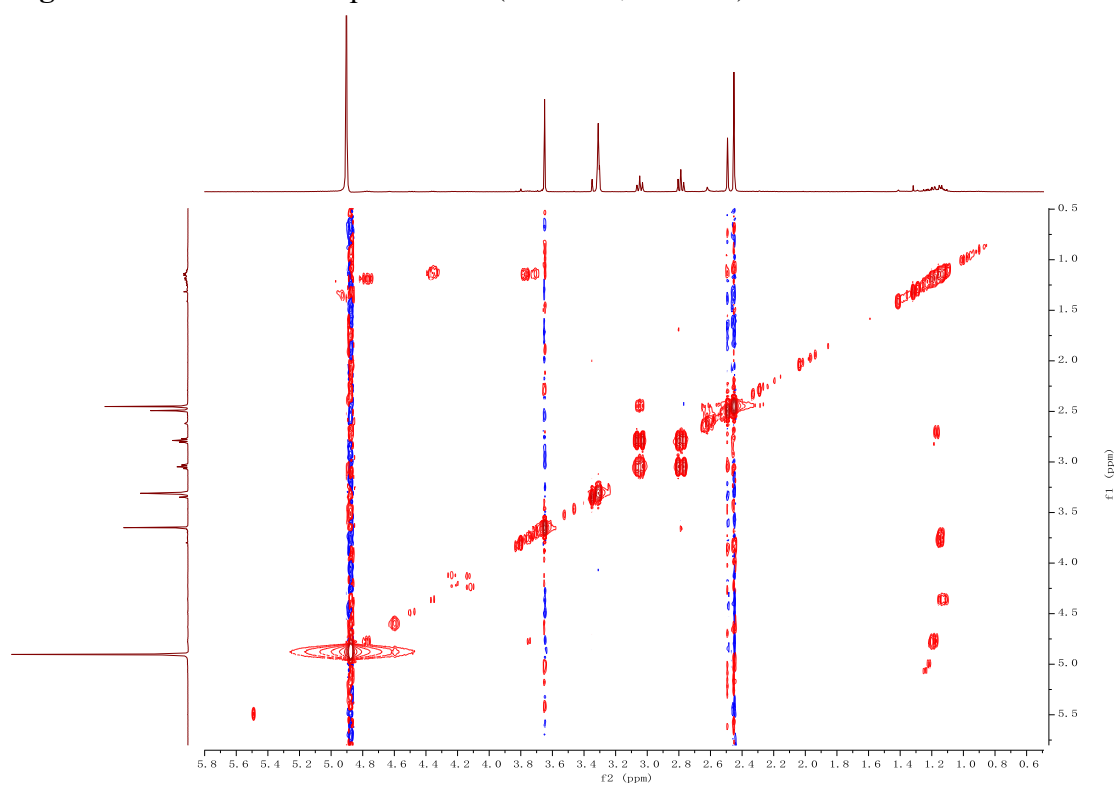

**Figure S6.** HRESIMS spectrum of **1**

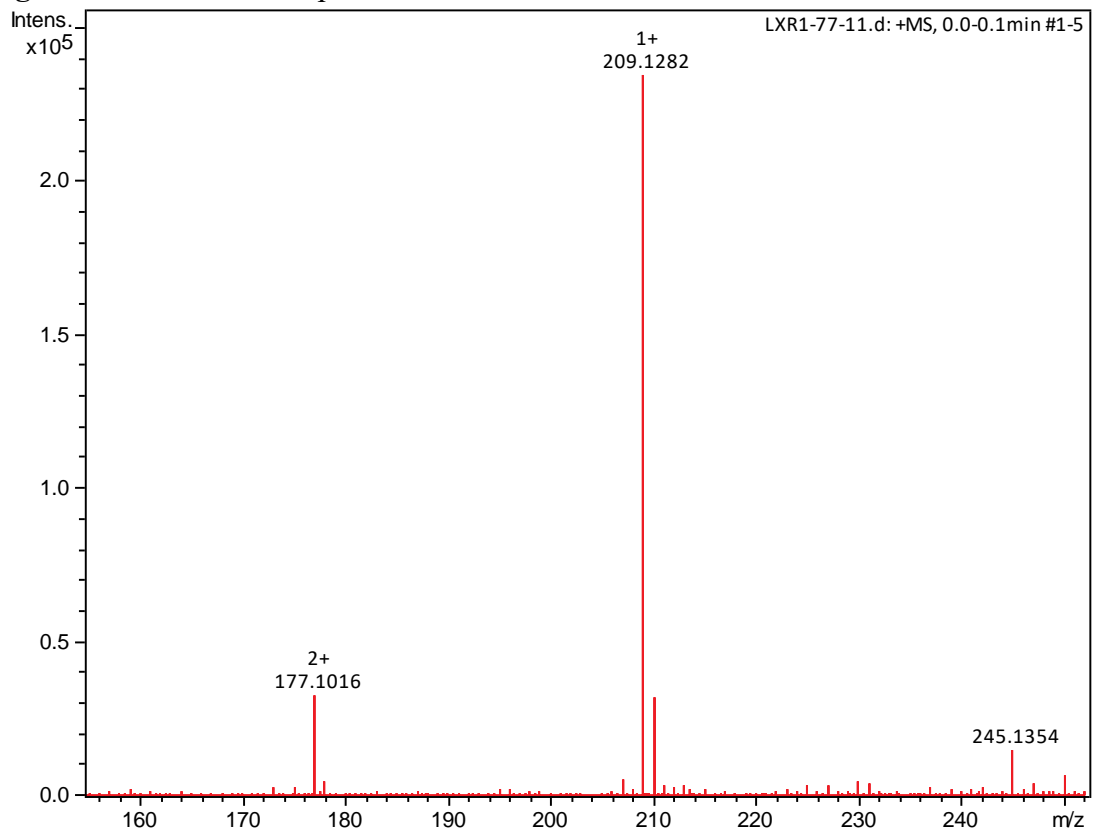

Figure S7. IR spectrum of 1

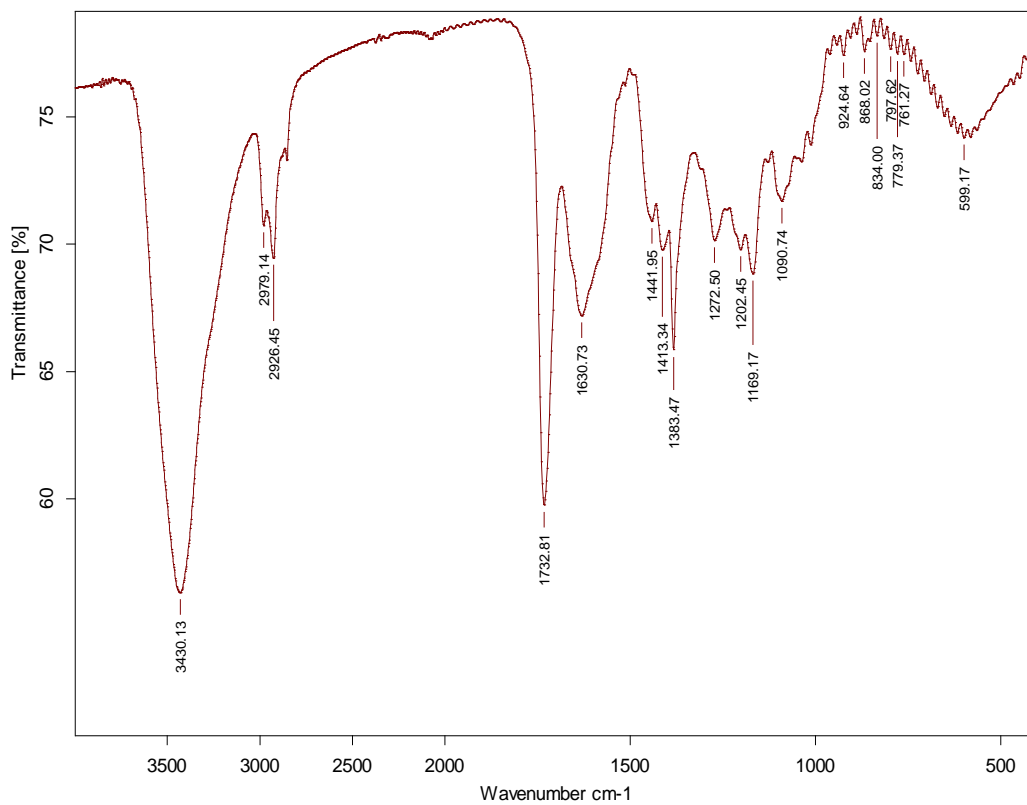

Figure S8. <sup>1</sup>H NMR spectra of 2 (400MHz, CD<sub>3</sub>OD)

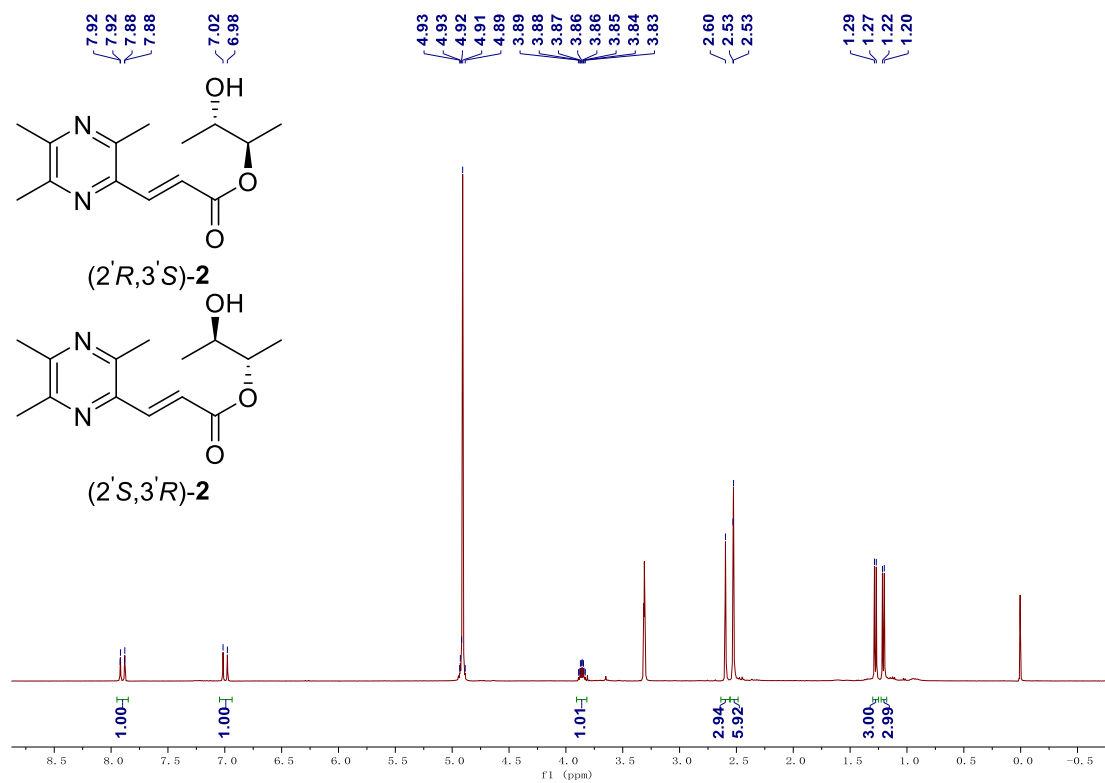

**Figure S9.**  $^{13}\text{C}$  NMR and DEPT NMR spectra of **2** (100MHz,  $\text{CD}_3\text{OD}$ )

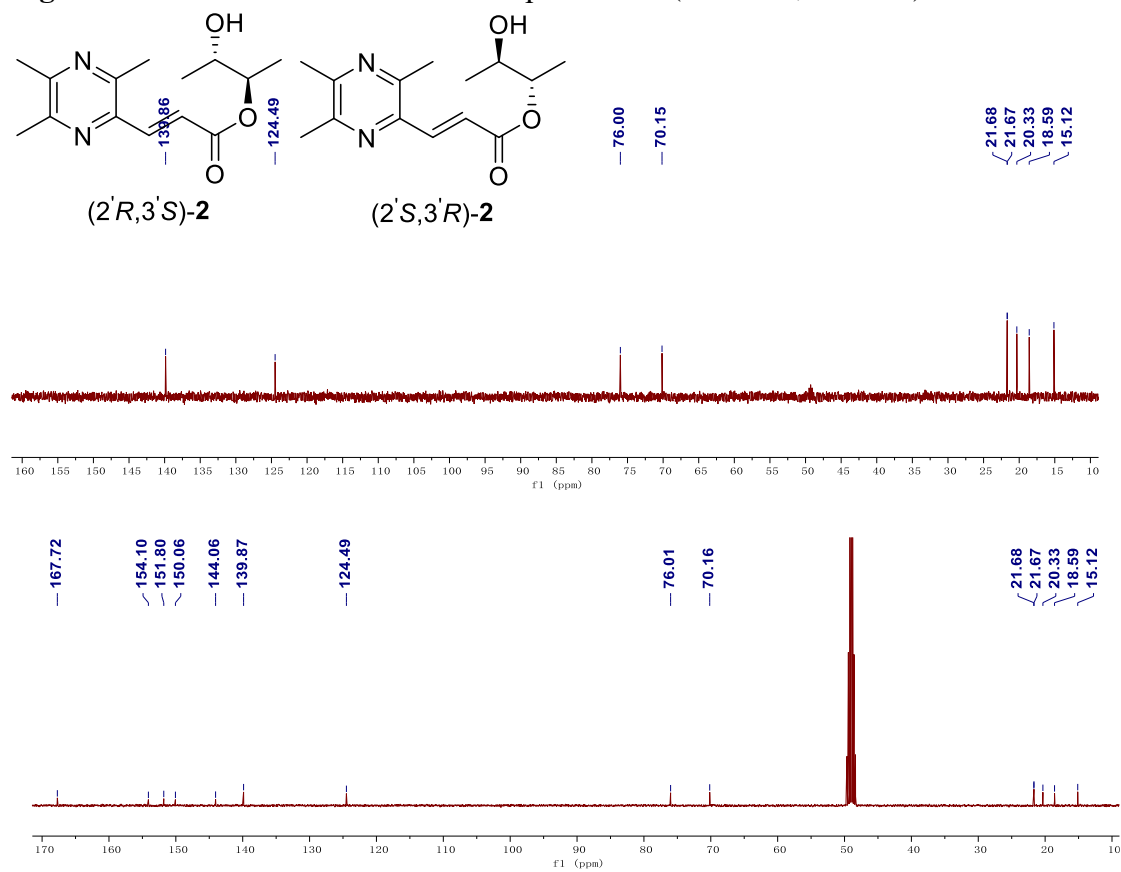

**Figure S10.** HSQC spectra of **2** ( $\text{CD}_3\text{OD}$ )

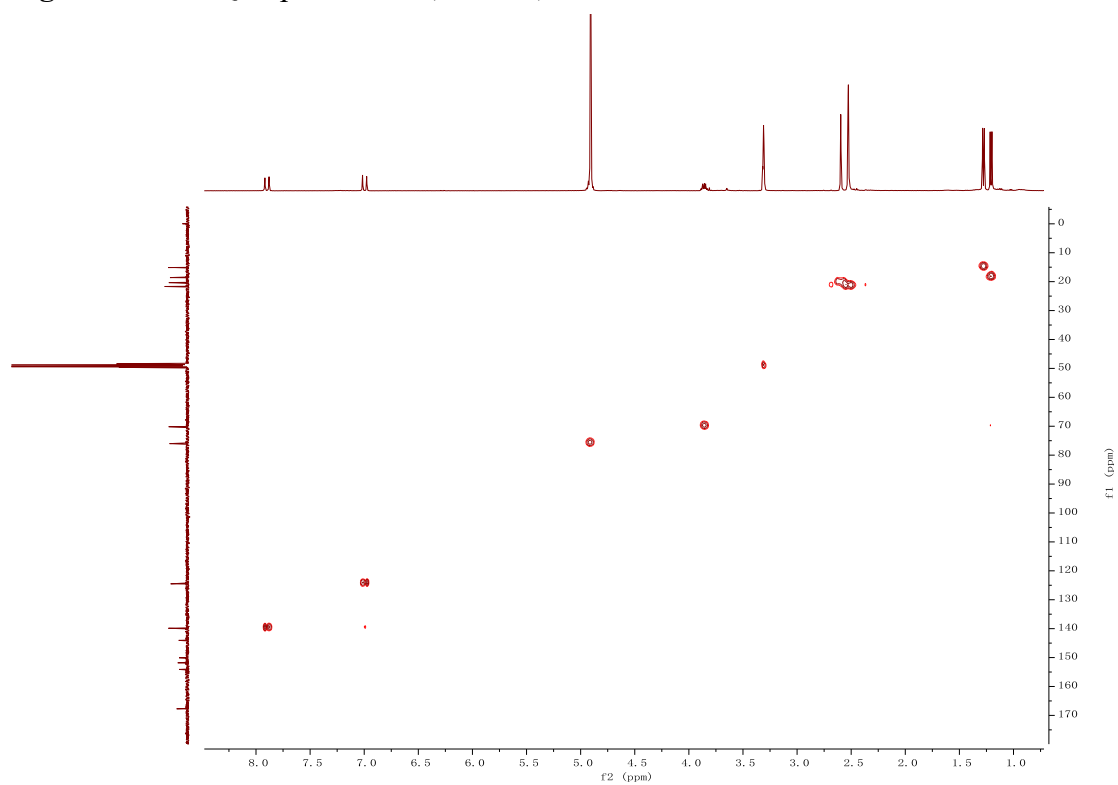

**Figure S11.** HMBC spectra of **2** (CD<sub>3</sub>OD)

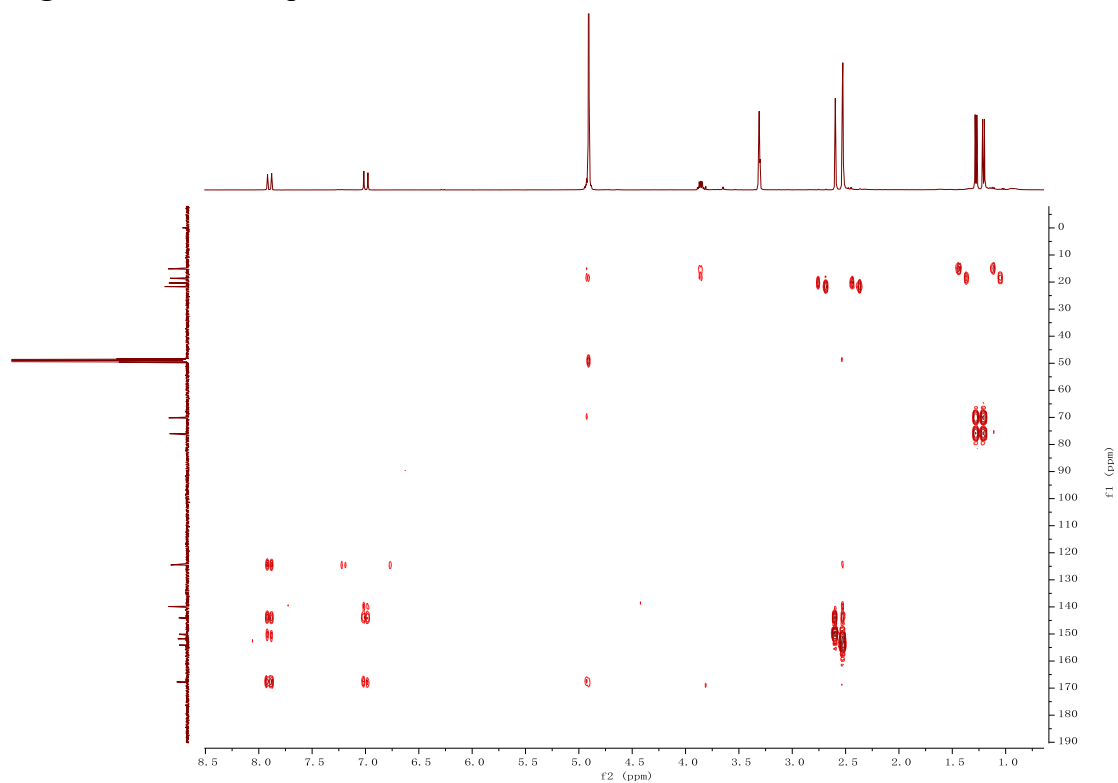

**Figure S12.** <sup>1</sup>H-<sup>1</sup>H COSY spectra of **2** (CD<sub>3</sub>OD)

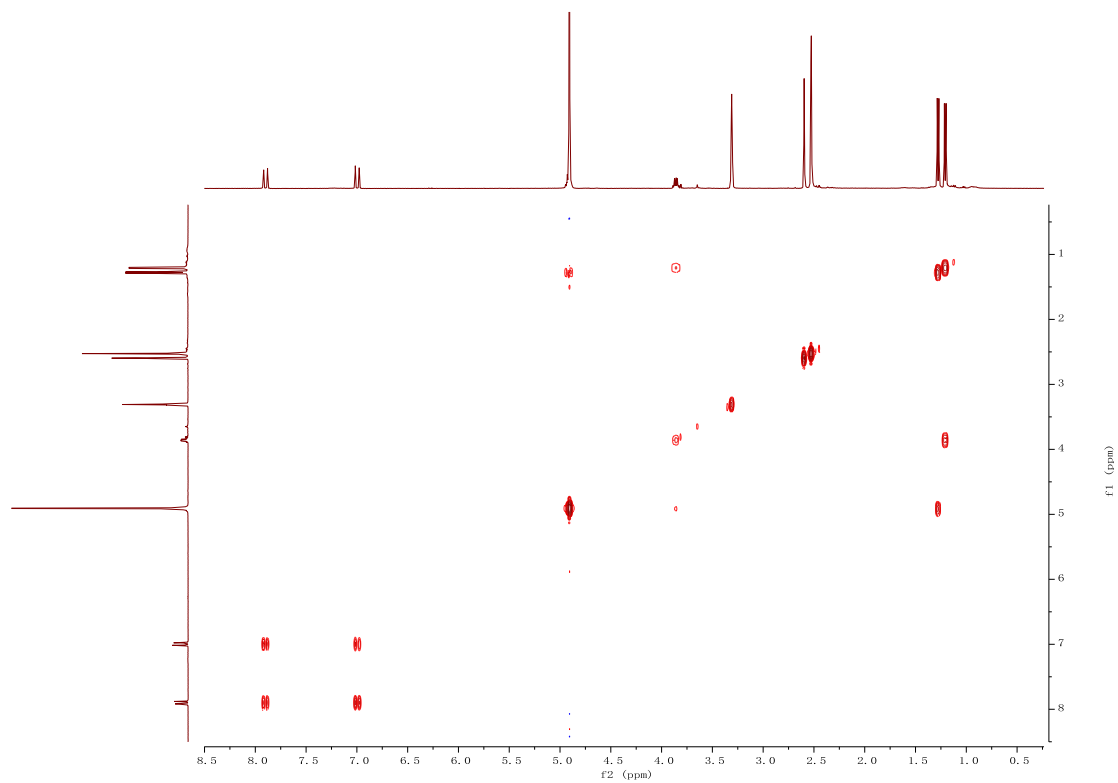



**Figure S13.** NOESY spectra of **2** (CD<sub>3</sub>OD)

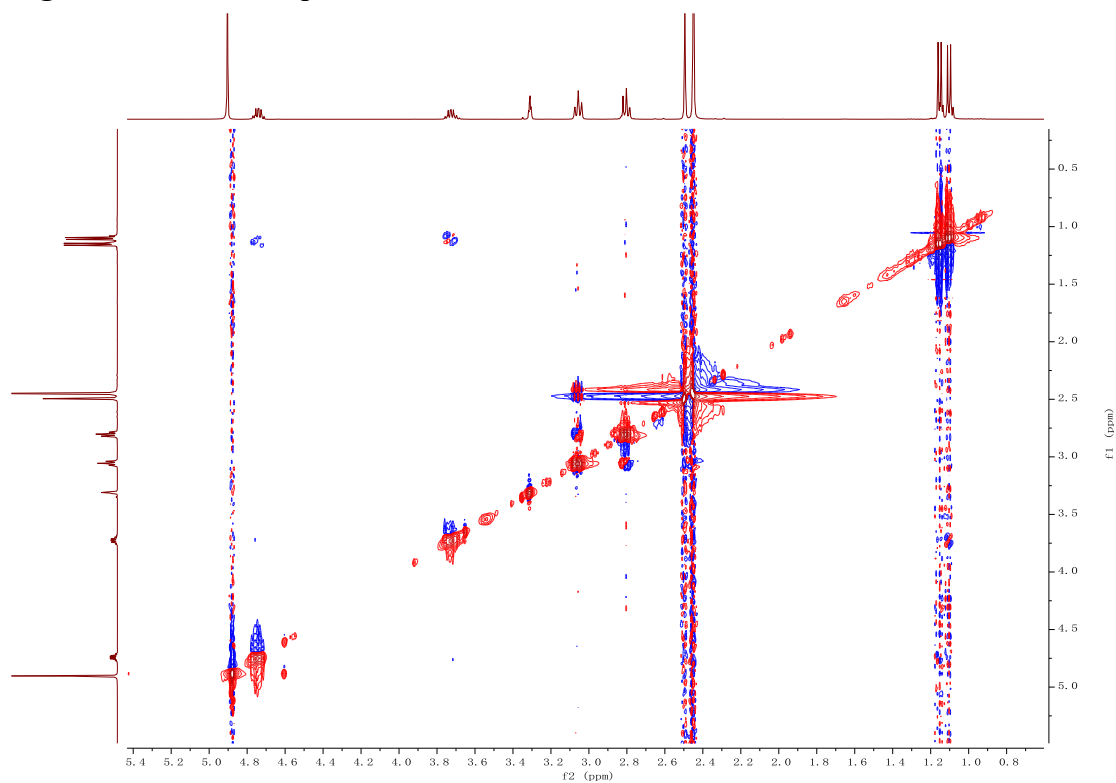

**Figure S14.** HRESIMS spectrum of **2**

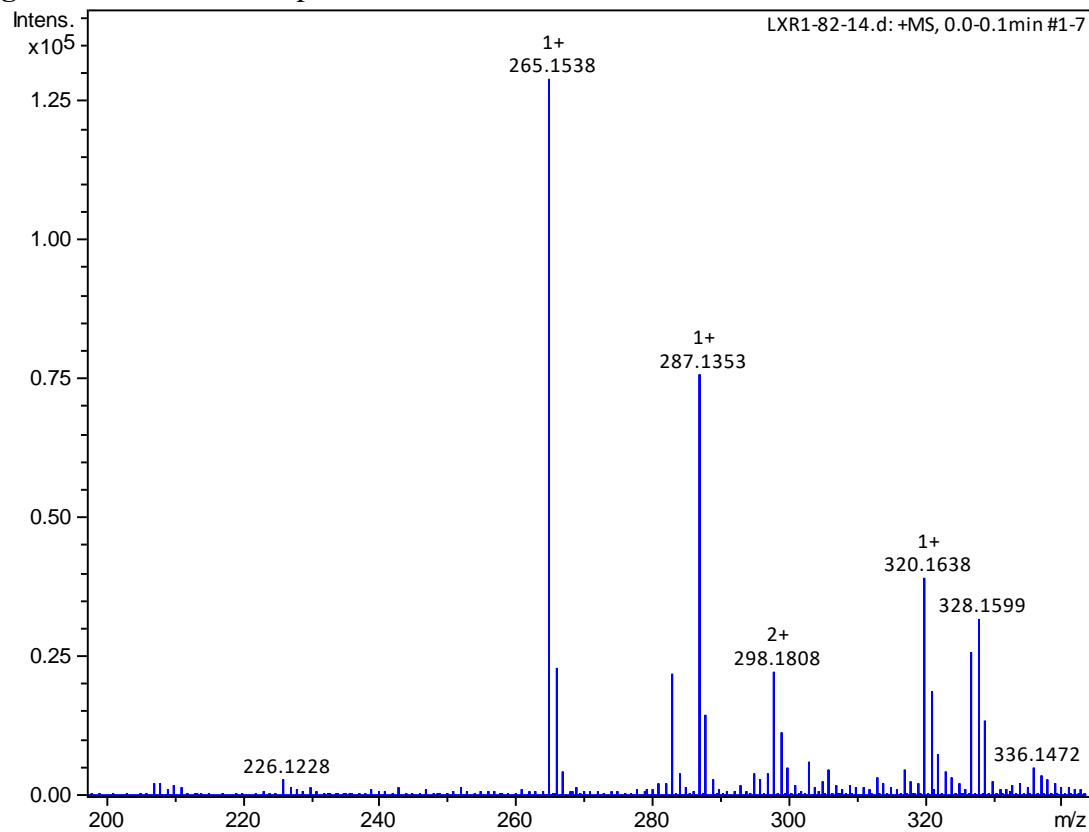

Figure S15. IR spectrum of **2**

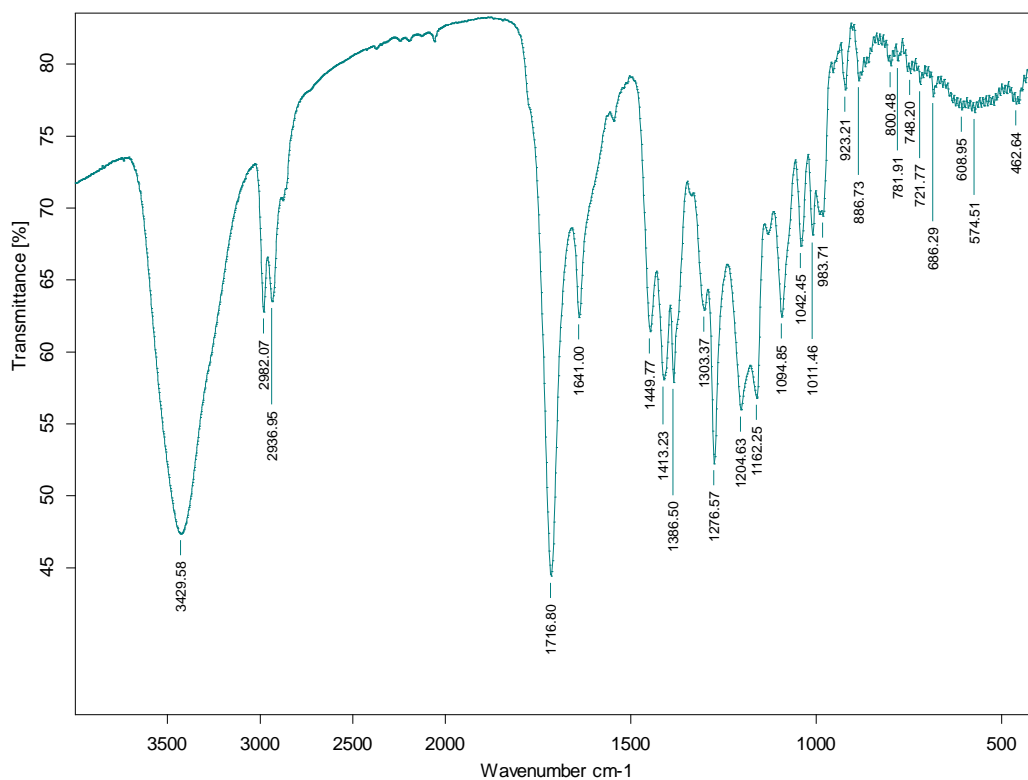

Figure S16. <sup>1</sup>H NMR spectra of **3** (400MHz, CD<sub>3</sub>OD)

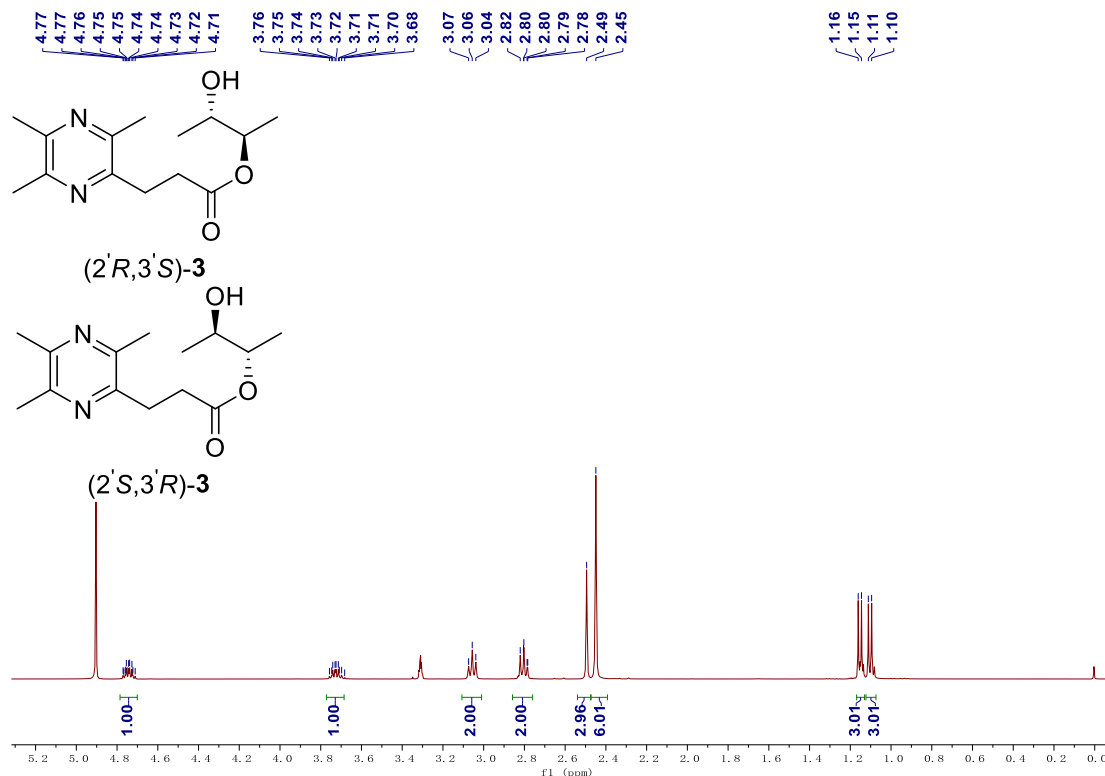

**Figure S17.**  $^{13}\text{C}$  NMR and DEPT NMR spectra of **3** (100MHz,  $\text{CD}_3\text{OD}$ )

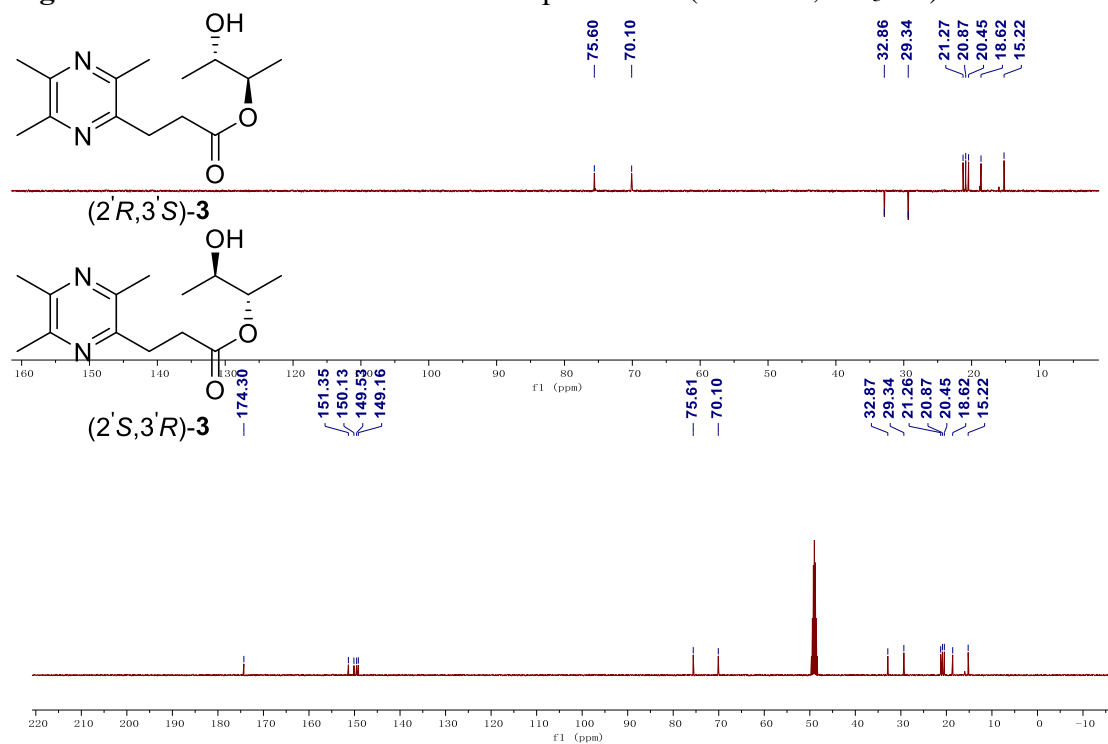

**Figure S18.** HSQC spectra of **3** ( $\text{CD}_3\text{OD}$ )

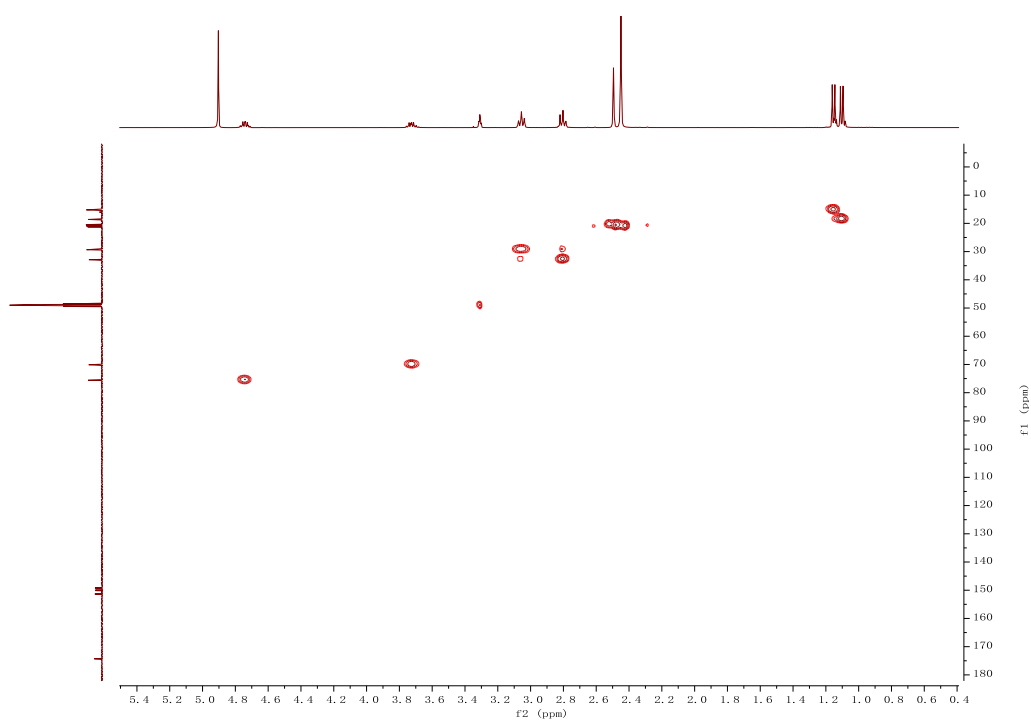

**Figure S19.** HMBC spectra of **3** (CD<sub>3</sub>OD)

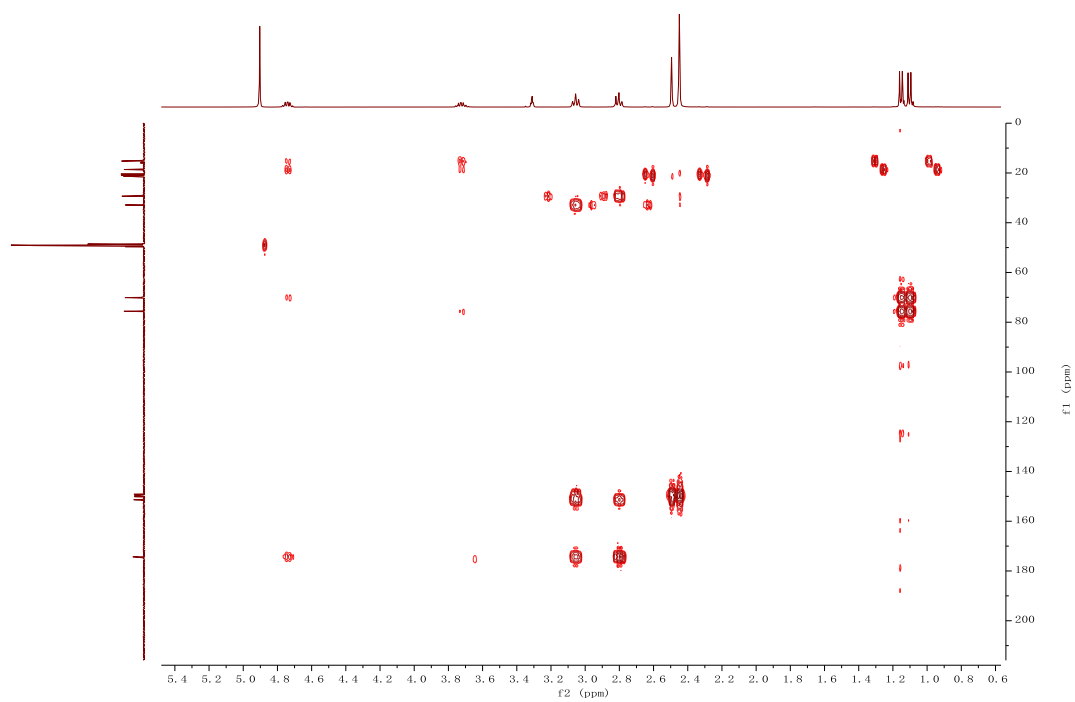

**Figure S20.** <sup>1</sup>H-<sup>1</sup>H COSY spectra of **3** (CD<sub>3</sub>OD)

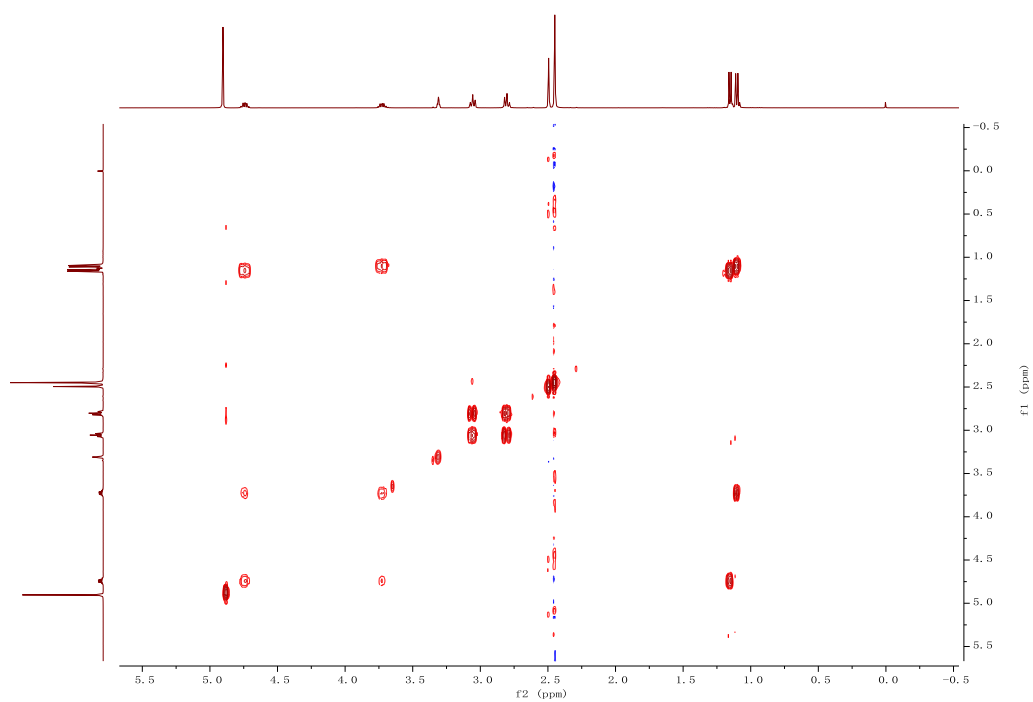

**Figure S21.** NOESY spectra of **3** (CD<sub>3</sub>OD)

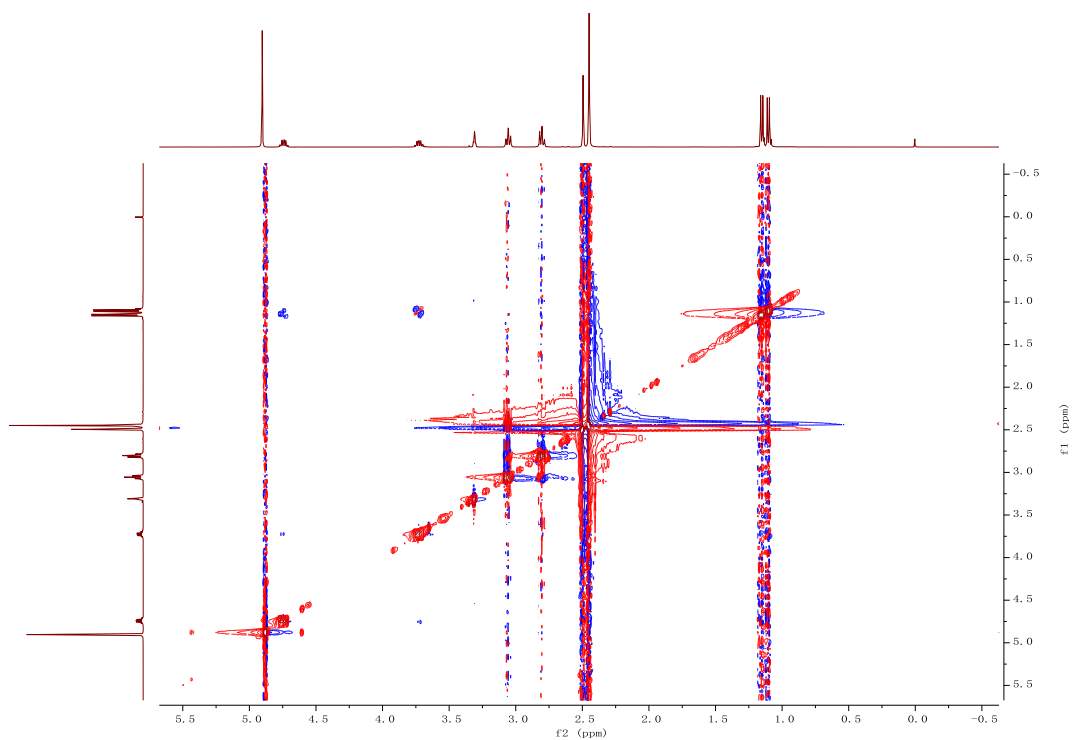

**Figure S22.** HRESIMS spectrum of **3**

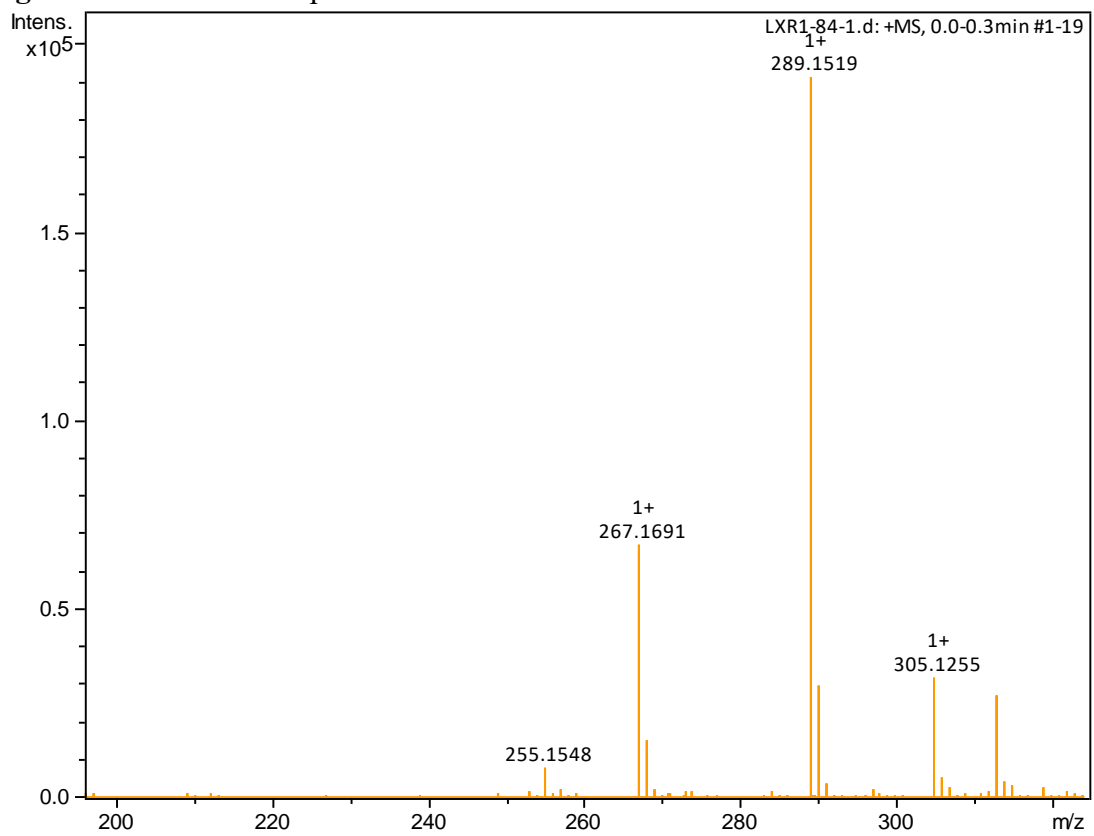

Figure S23. IR spectrum of **3**

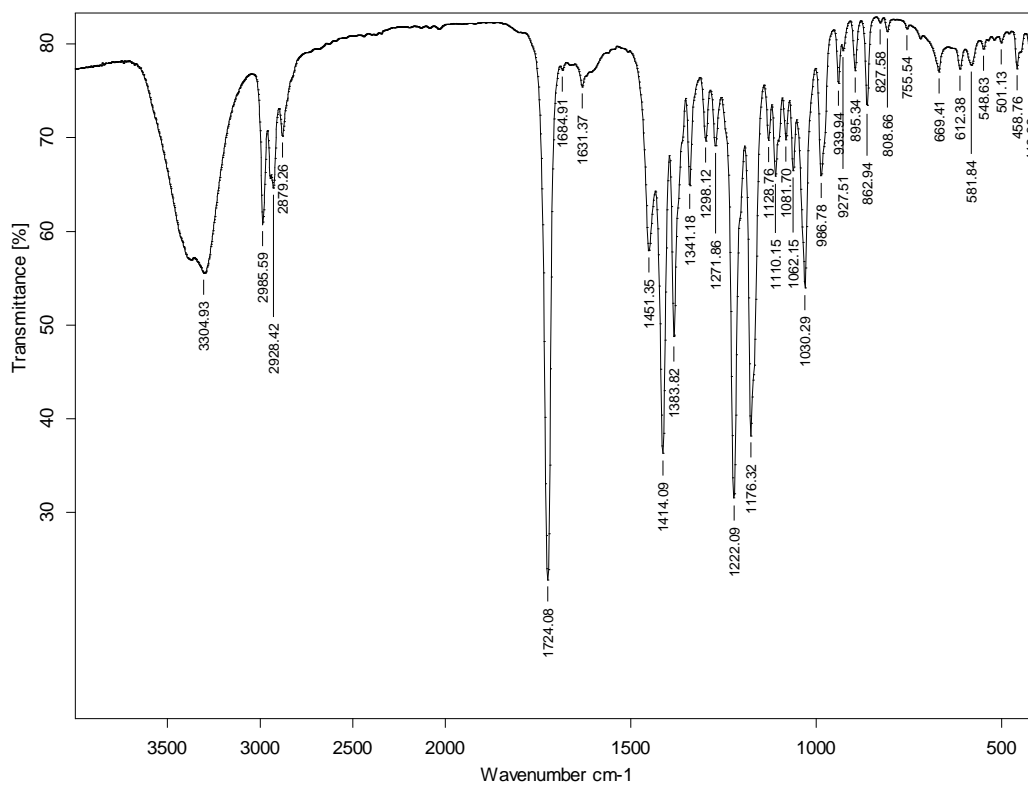

Figure S24. <sup>1</sup>H NMR spectra of (2'*R*,3'*S*)-**4** (400MHz, Chloroform-*d*)

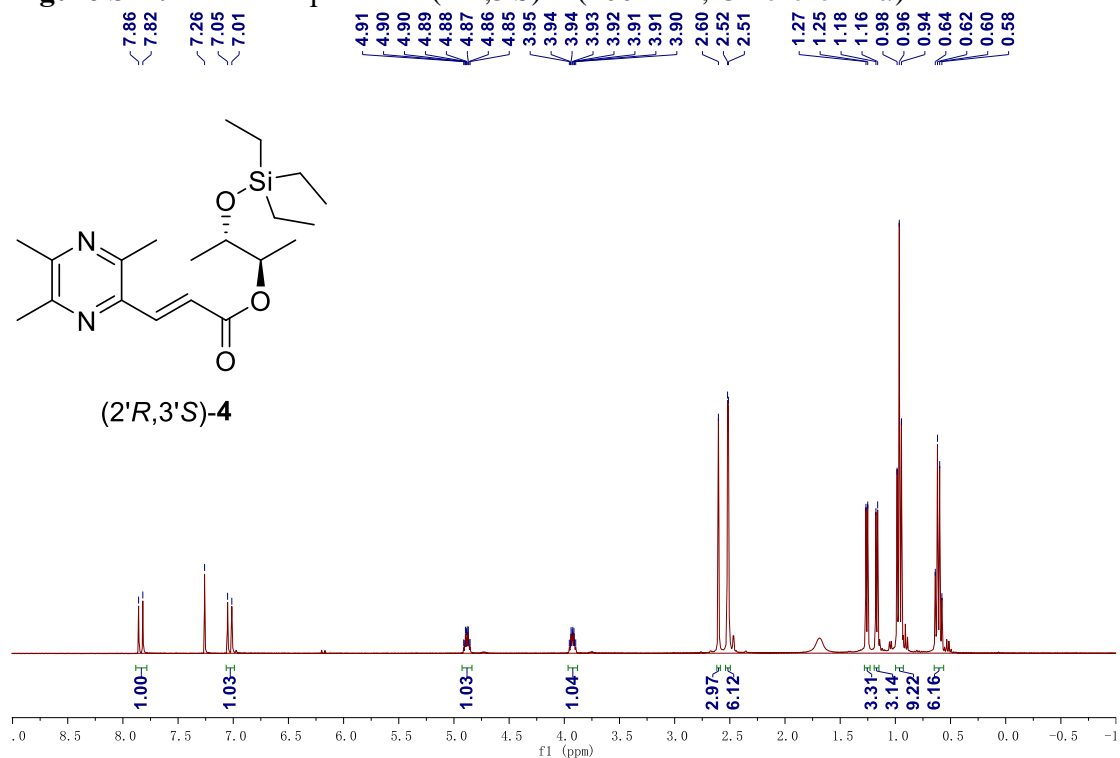

Figure S25.  $^{13}\text{C}$  NMR spectra of (2'R,3'S)-4 (100MHz, Chloroform-d)

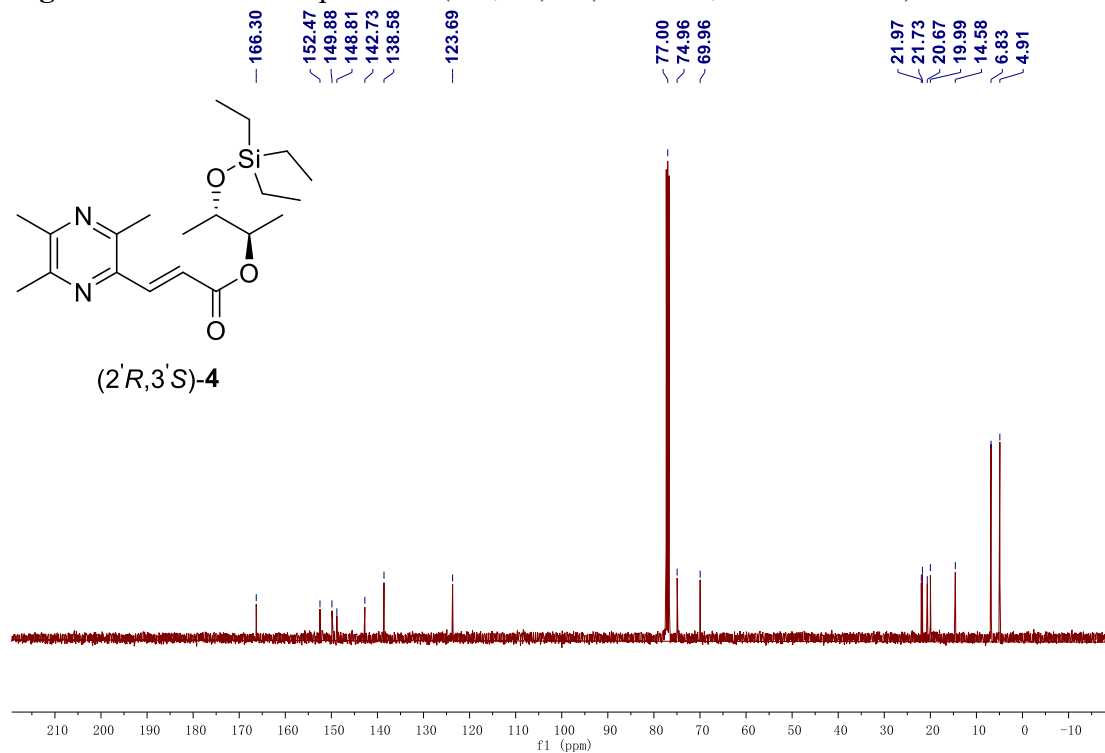

Figure S26.  $^1\text{H}$  NMR spectra of (2'S,3'R)-4 (400MHz, Chloroform-d)

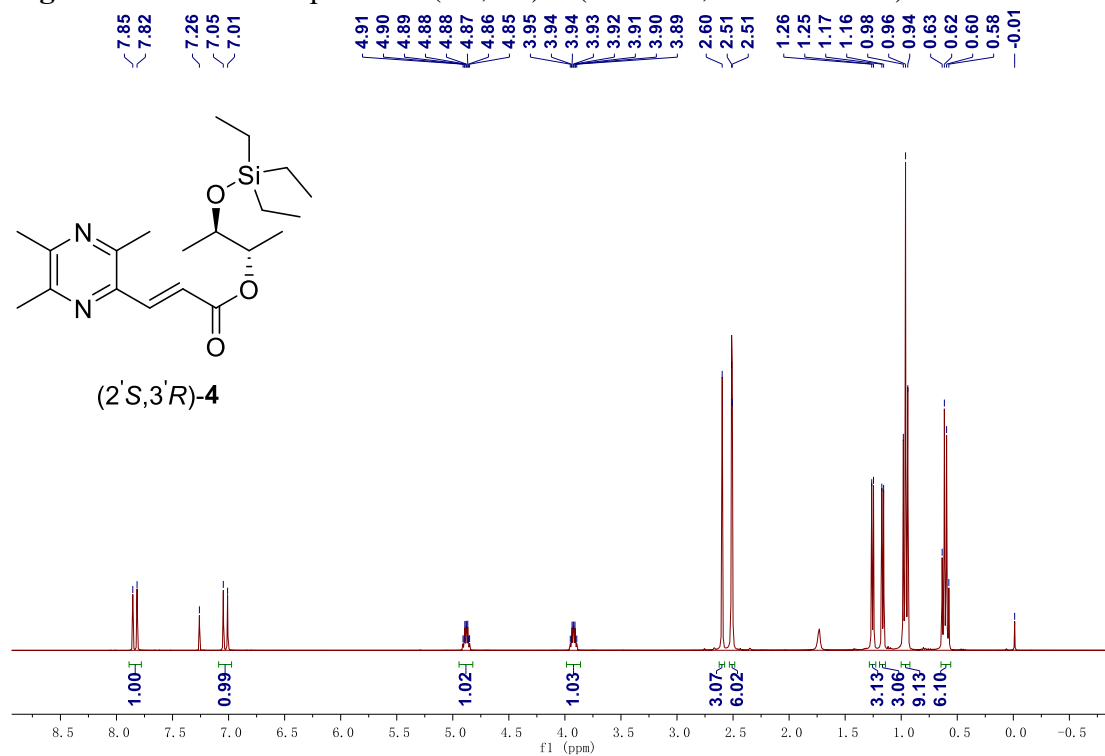

Figure S27.  $^{13}\text{C}$  NMR spectra of (2'S,3'R)-4 (100MHz, Chloroform-d)

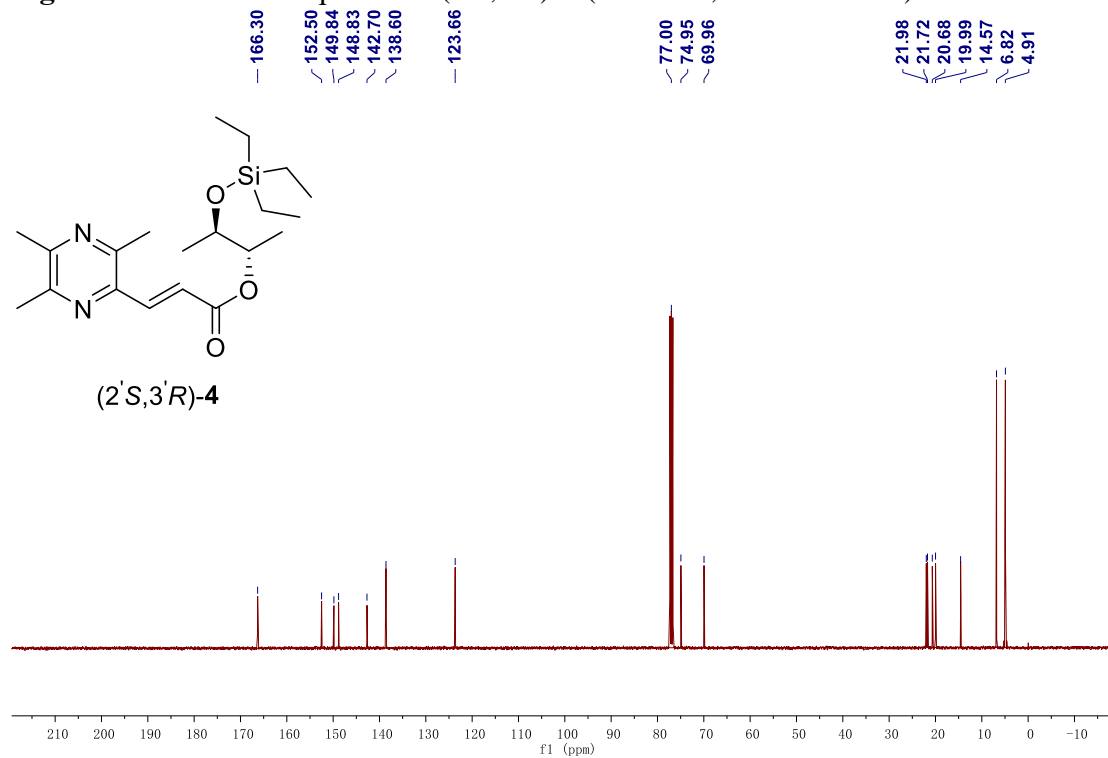

Figure S28.  $^1\text{H}$  NMR spectra of (2'R,3'R)-4 (400MHz, Chloroform-d)

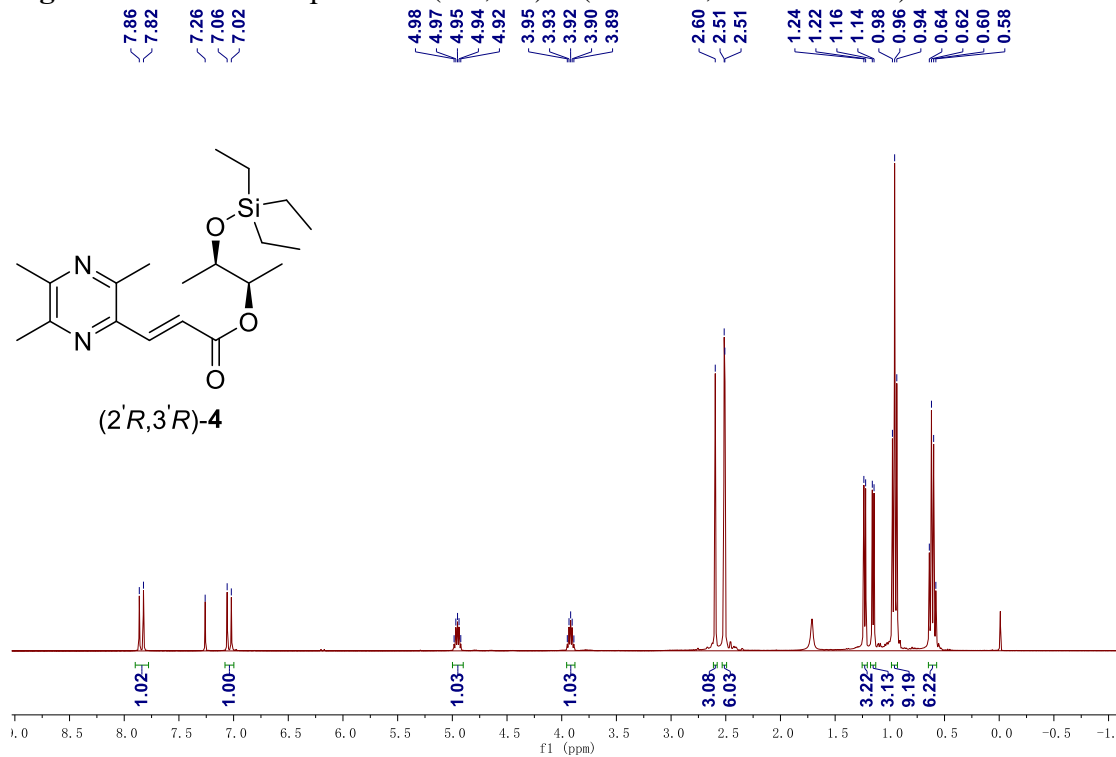



Figure S29.  $^{13}\text{C}$  NMR spectra of (2'*R*,3'*R*)-4 (100MHz, Chloroform-*d*)

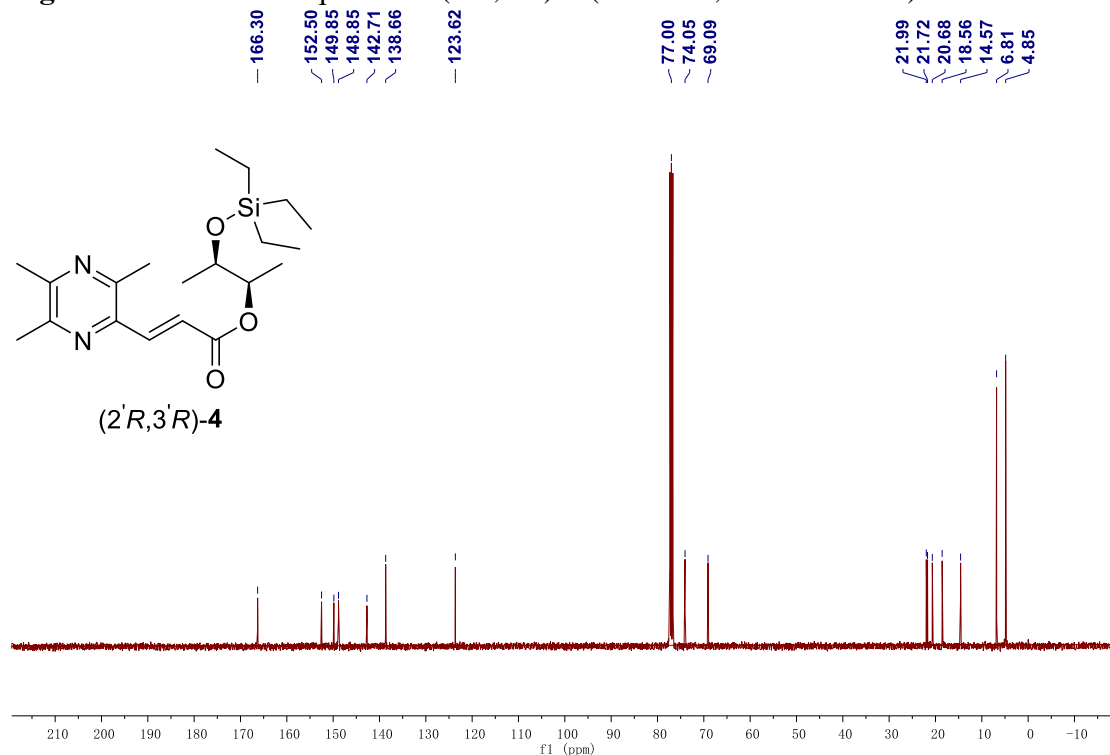

Figure S30.  $^1\text{H}$  NMR spectra of (2'*S*,3'*S*)-4 (400MHz, Chloroform-*d*)

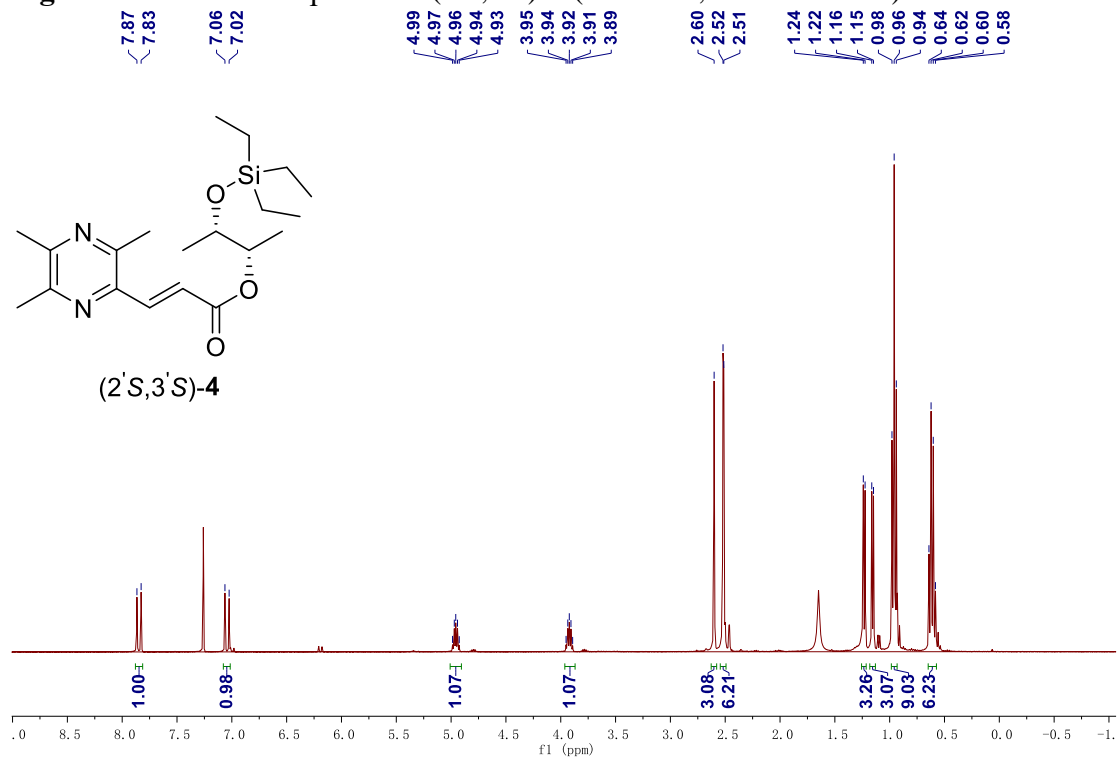

Figure S31.  $^{13}\text{C}$  NMR spectra of (2'S,3'S)-4 (100MHz, Chloroform-d)

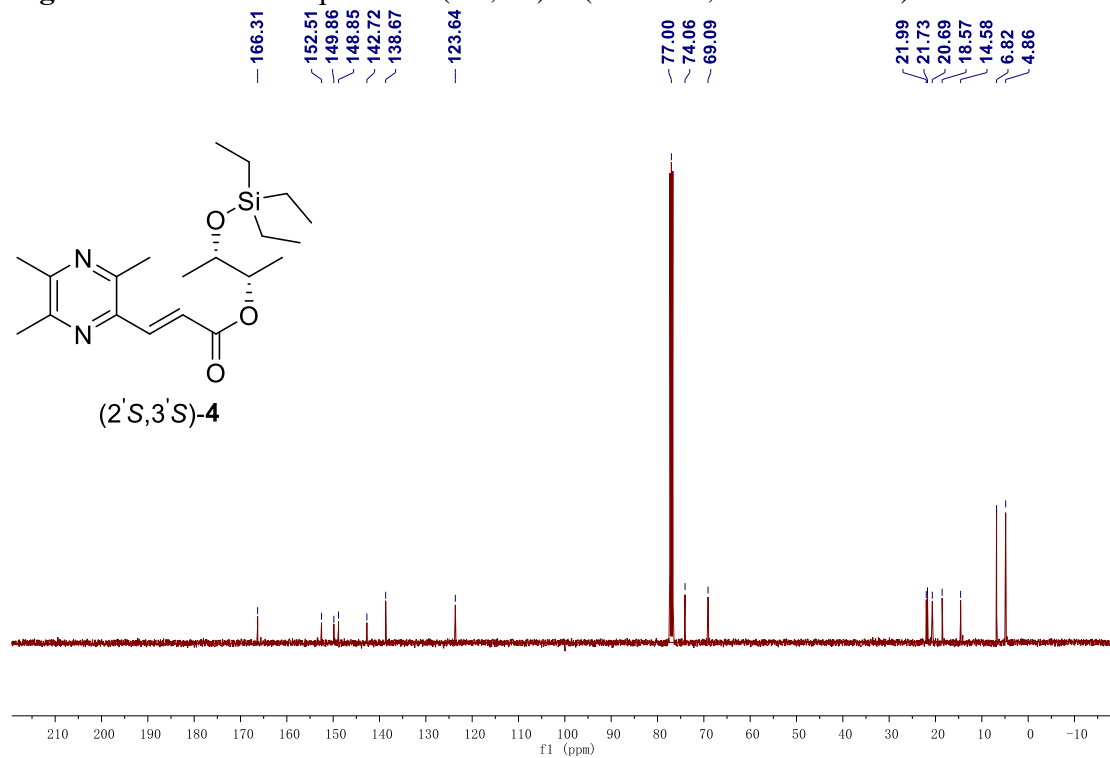

Figure S32.  $^1\text{H}$  NMR spectra of (2'R,3'S)-2 (400MHz, Chloroform-d)

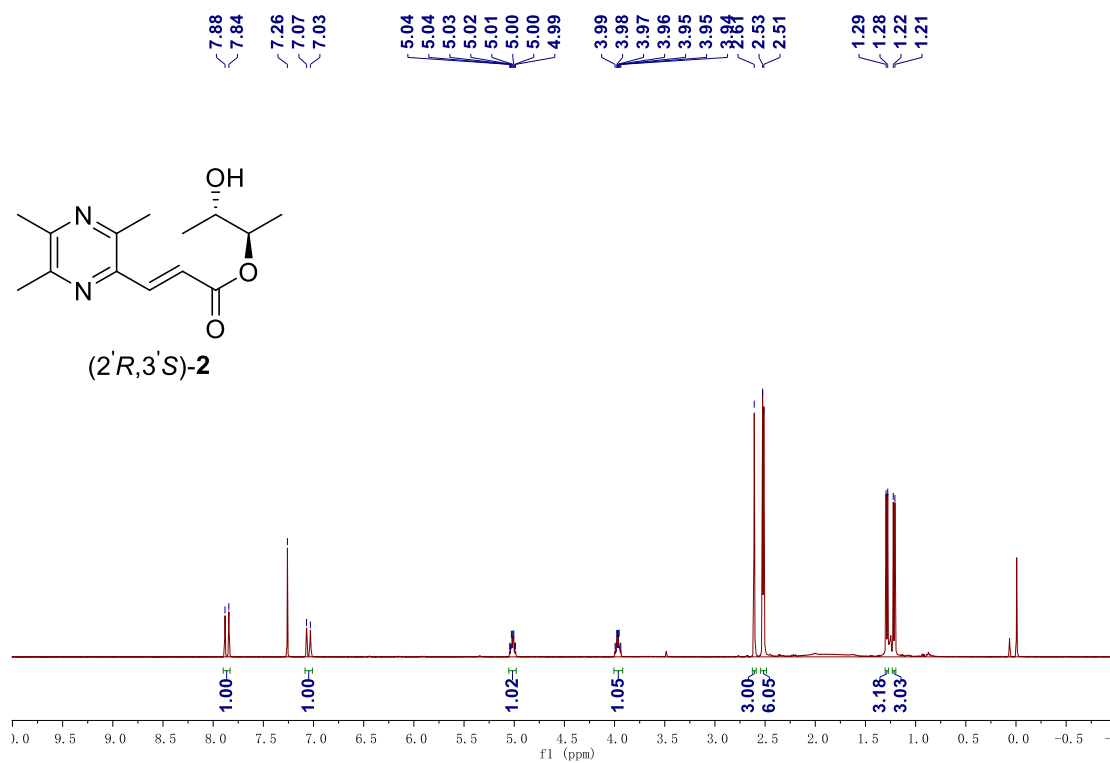

**Figure S33.**  $^{13}\text{C}$  NMR spectra of (2'*R*,3'*S*)-2 (100MHz, Chloroform-*d*)

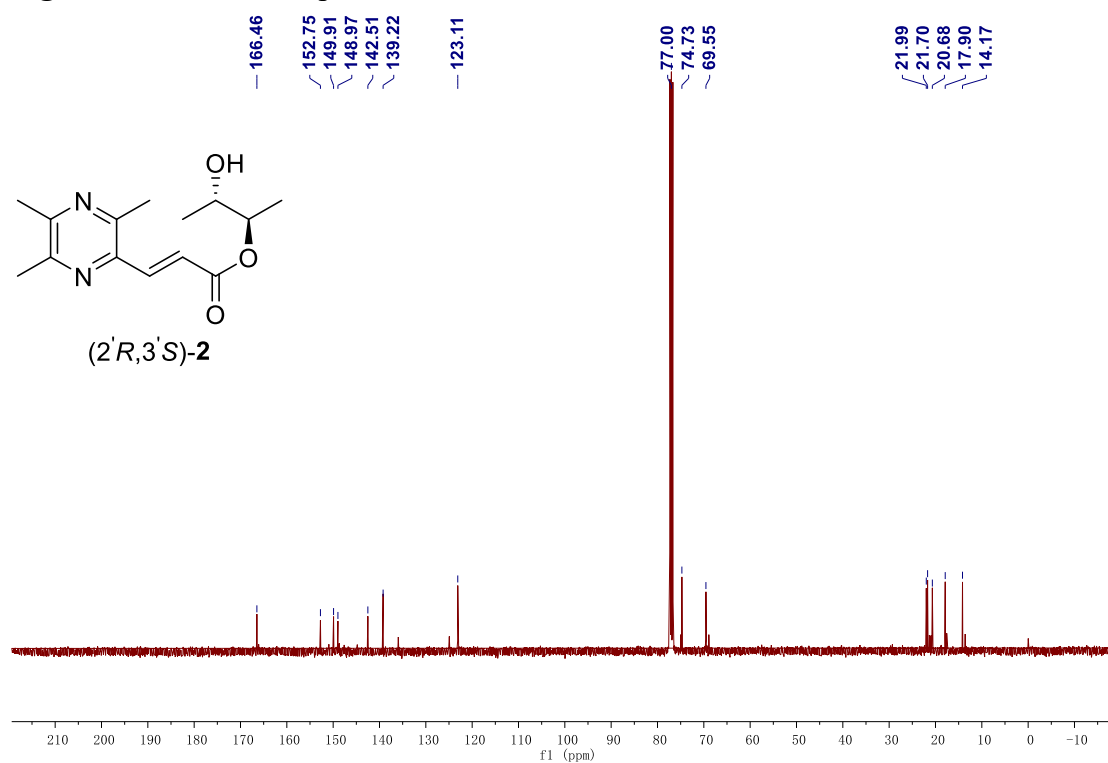

**Figure S34.**  $^1\text{H}$ - $^1\text{H}$  COSY spectrum of (2'*R*,3'*S*)-2 (Chloroform-*d*)

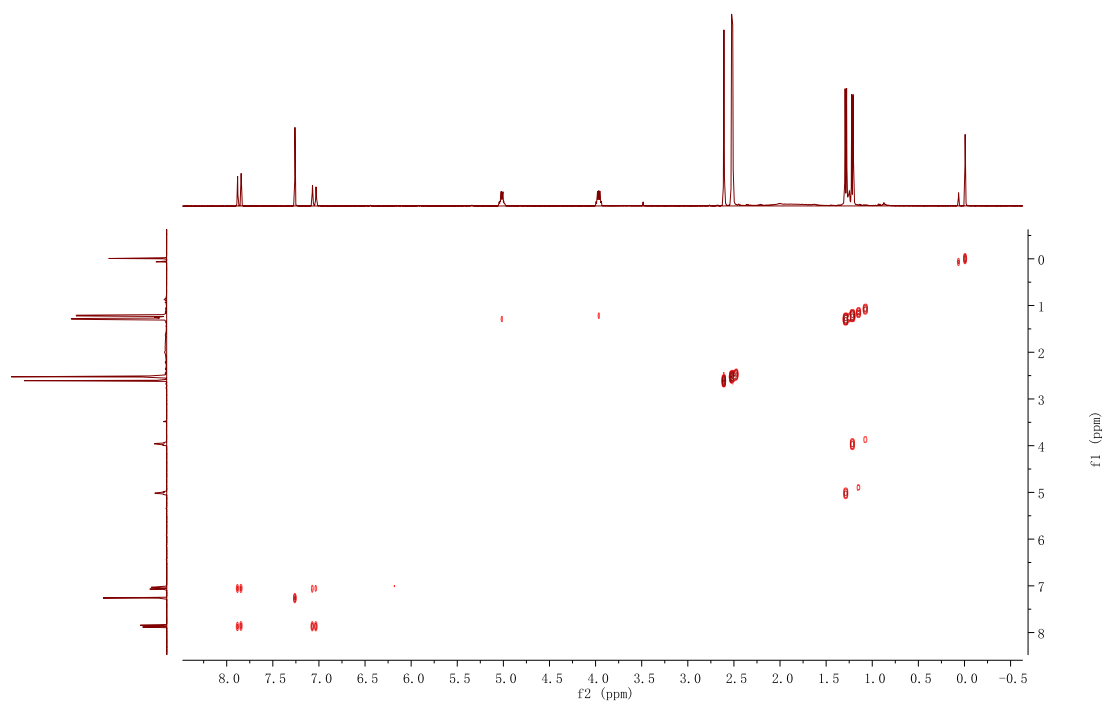

**Figure S35.** HSQC spectrum of (2'*R*,3'*S*)-2 (Chloroform-*d*)

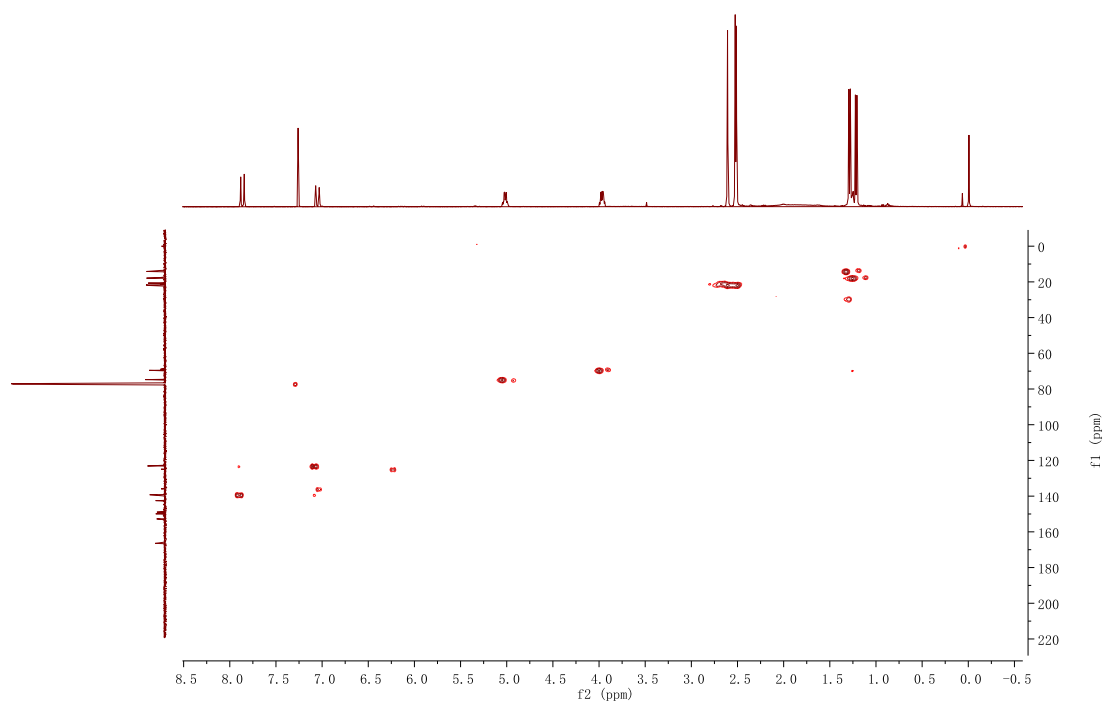

**Figure S36.** HMBC spectrum of (2'*R*,3'*S*)-2 (Chloroform-*d*)

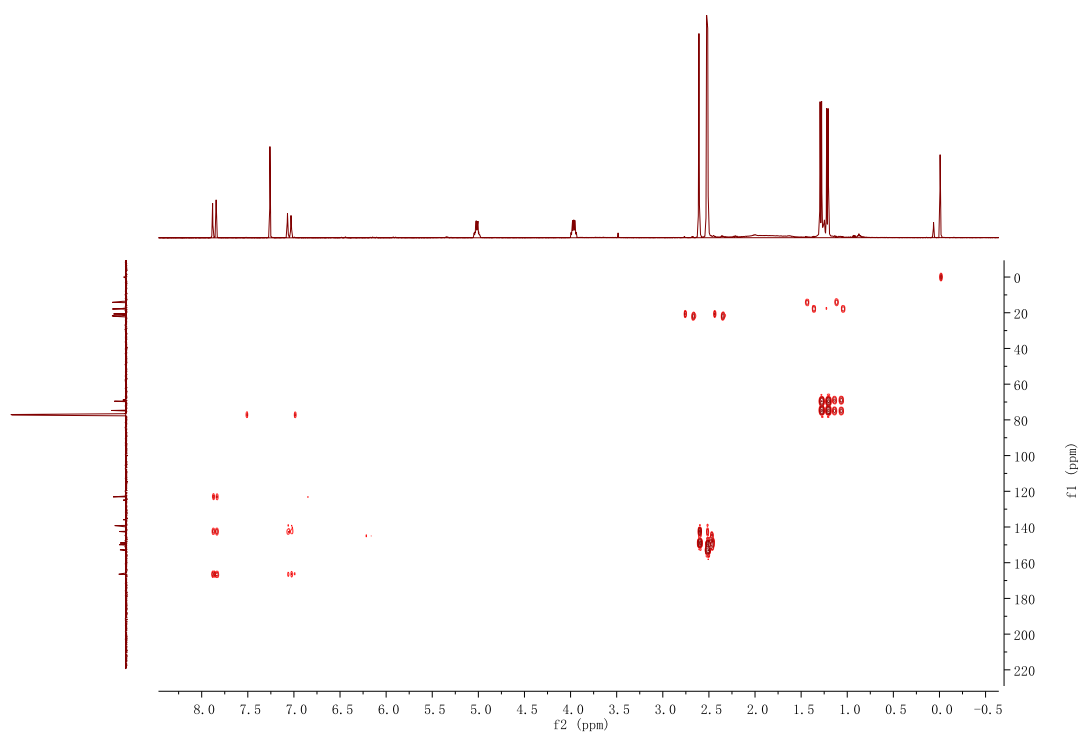

**Figure S37.** NOESY spectrum of (2'*R*,3'*S*)-**2** (Chloroform-*d*)

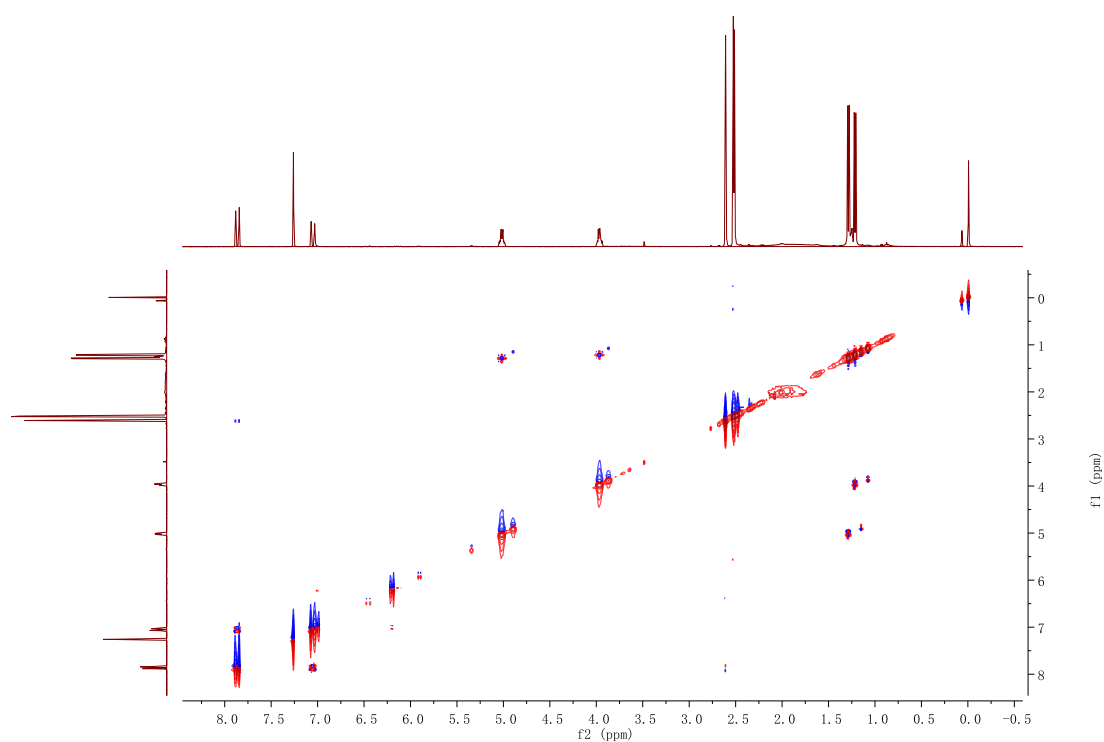

**Figure S38.** <sup>1</sup>H NMR spectra of (2'*S*,3'*R*)-**2** (400MHz, Chloroform-*d*)

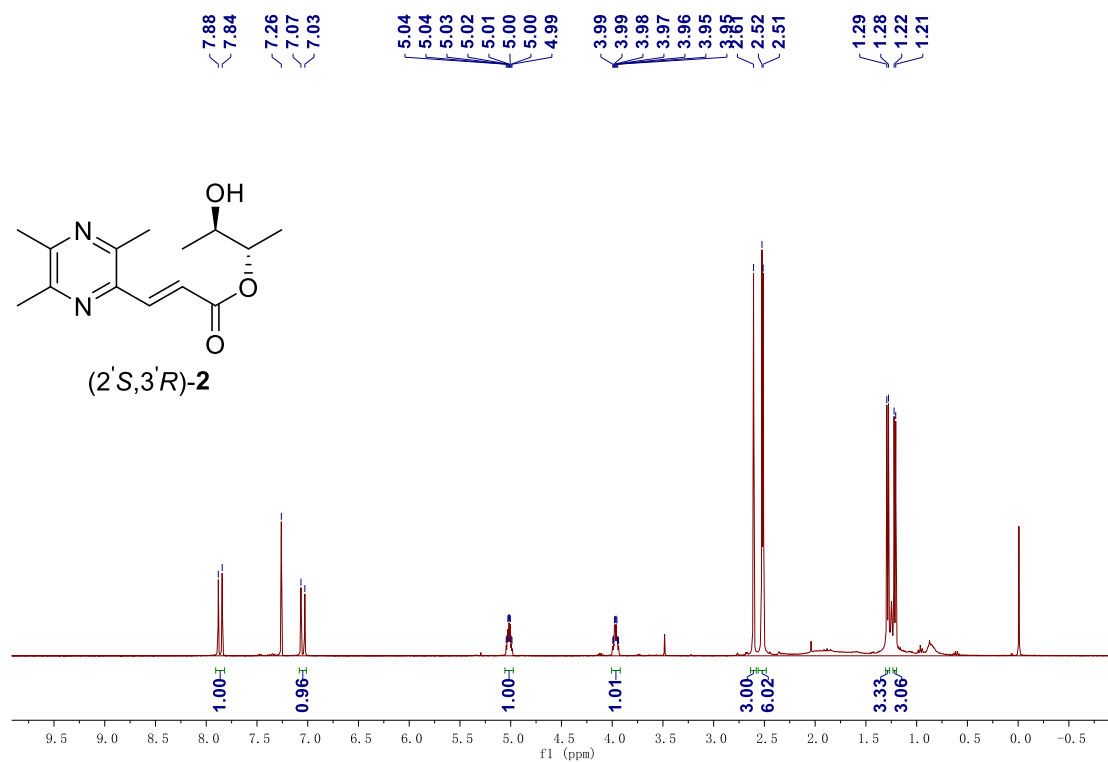

**Figure S39.**  $^{13}\text{C}$  NMR spectra of (2'S,3'R)-2 (100MHz, Chloroform-*d*)

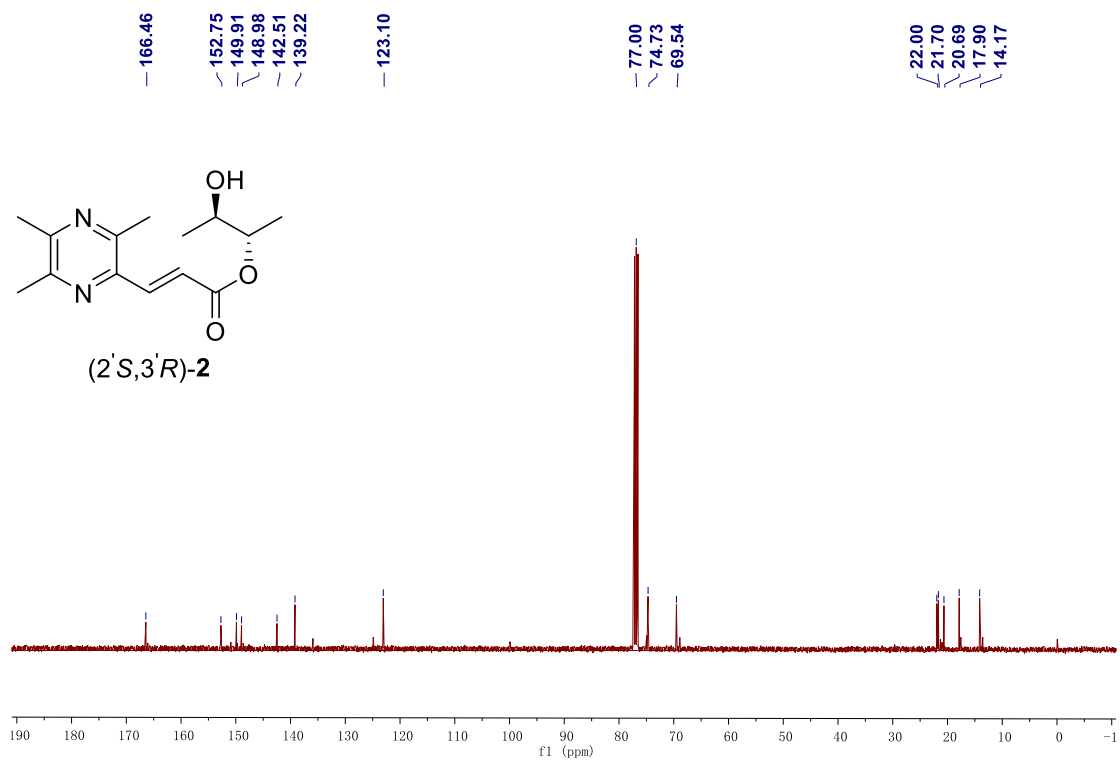

**Figure S40.**  $^1\text{H}$ - $^1\text{H}$  COSY spectrum of (2'S,3'R)-2 (Chloroform-*d*)

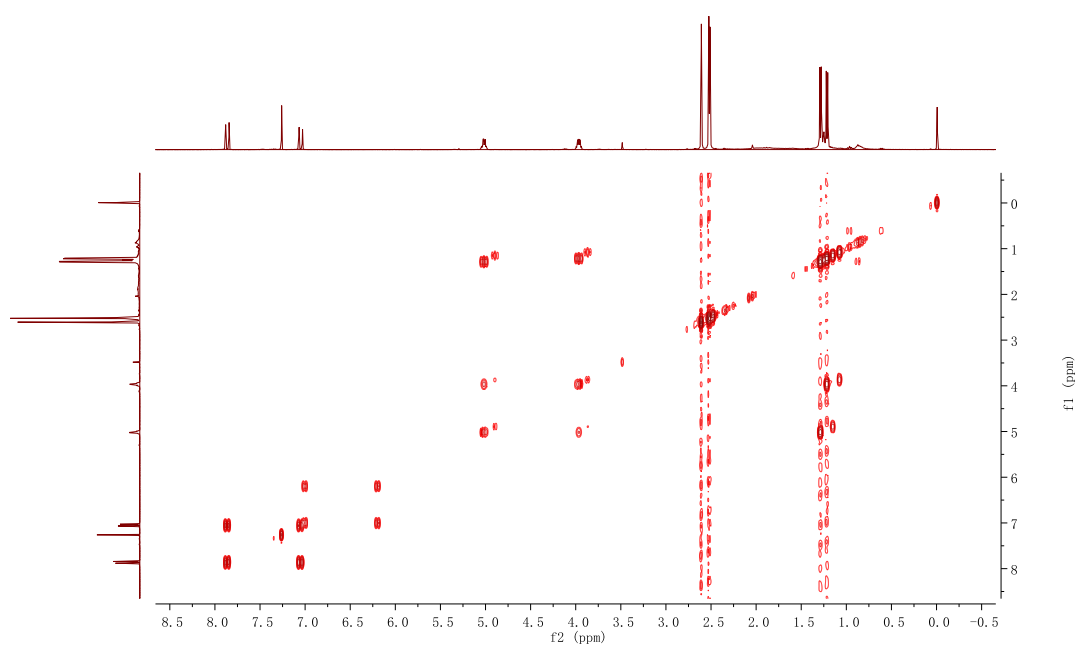

**Figure S41.** HSQC spectrum of (2'*S*,3'*R*)-**2** (Chloroform-*d*)

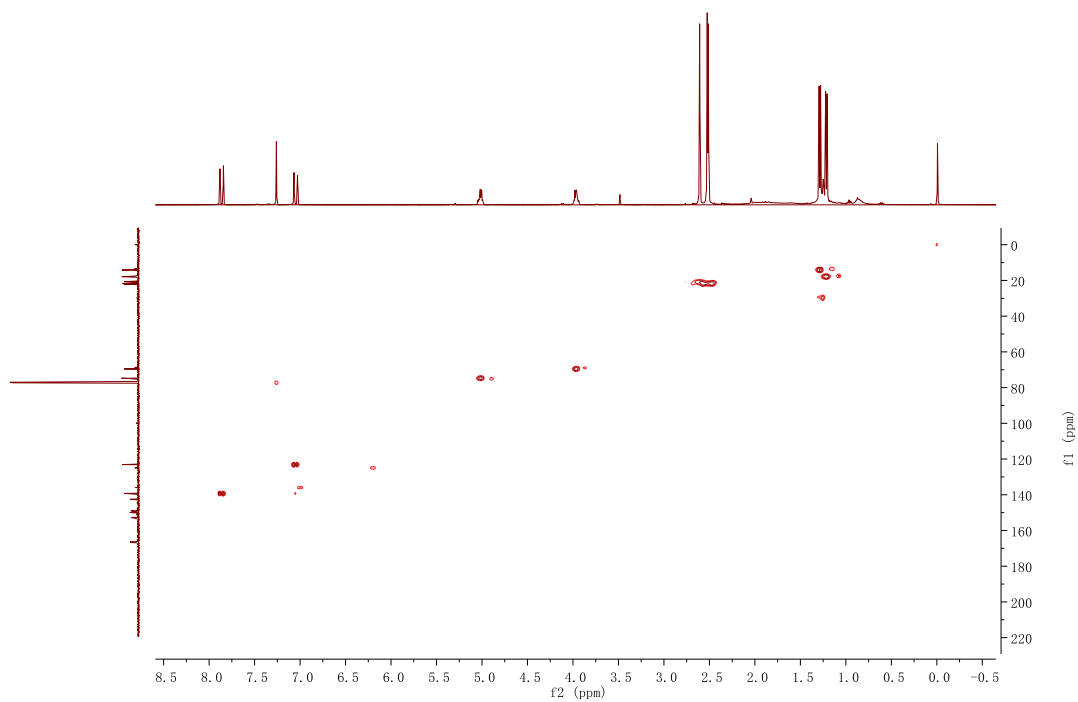

**Figure S42.** HMBC spectrum of (2'*S*,3'*R*)-**2** (Chloroform-*d*)

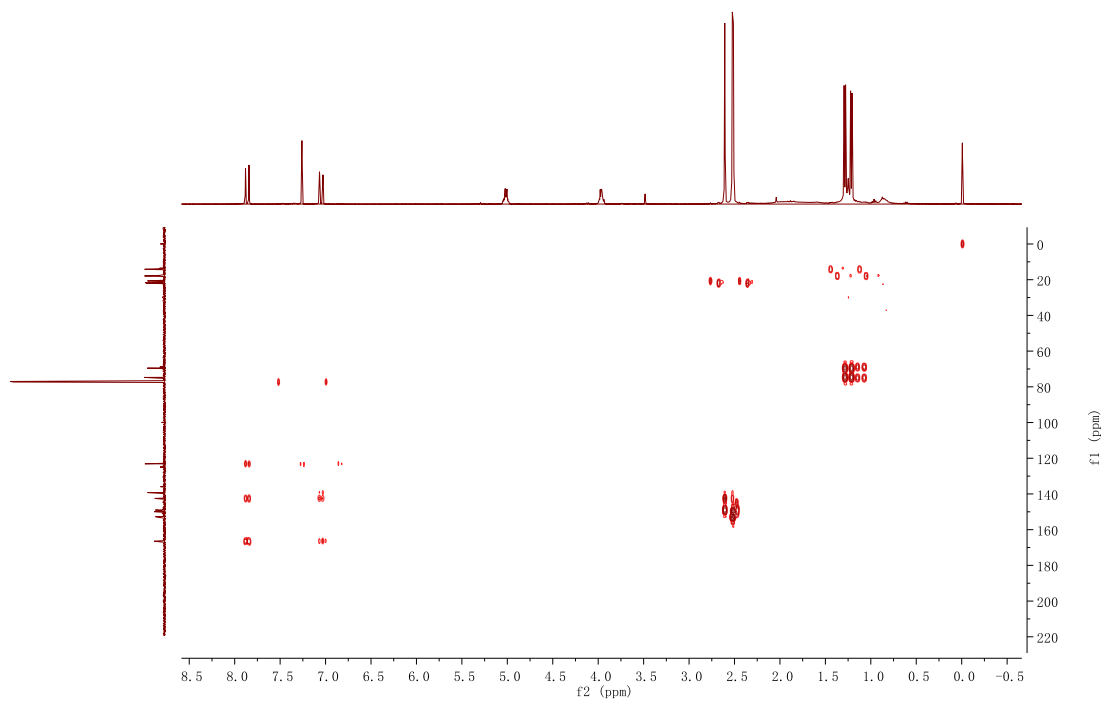

**Figure S43.** NOESY spectrum of (2',3'R)-2 (Chloroform-d)

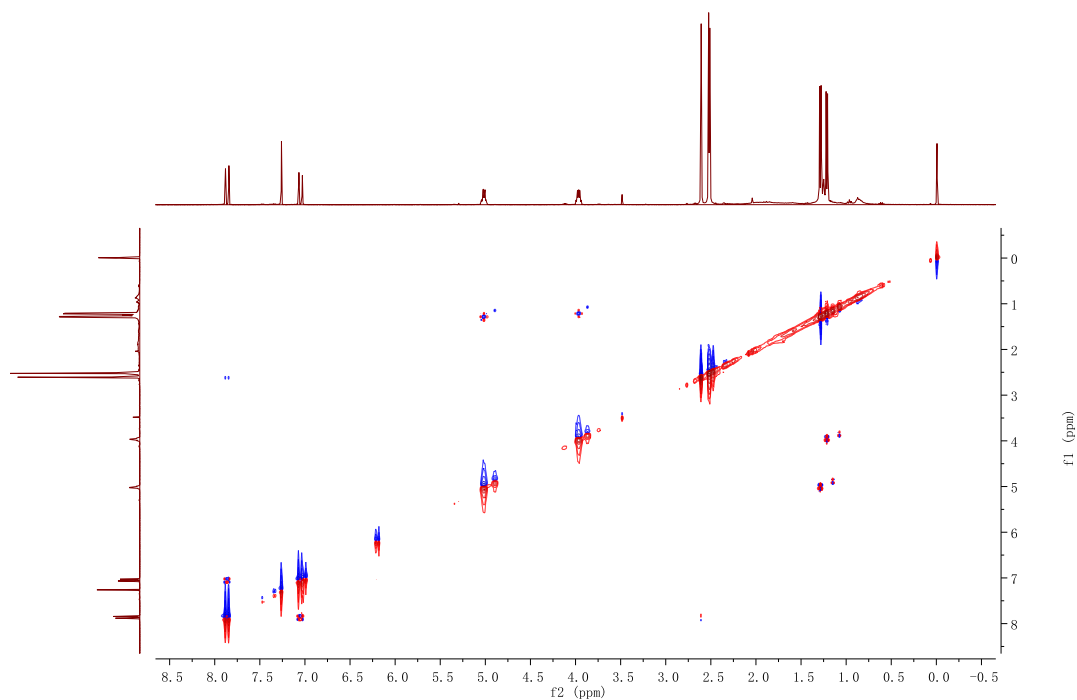

**Figure S44.** <sup>1</sup>H NMR spectra of (2',3'R)-2 (400MHz, Chloroform-d)

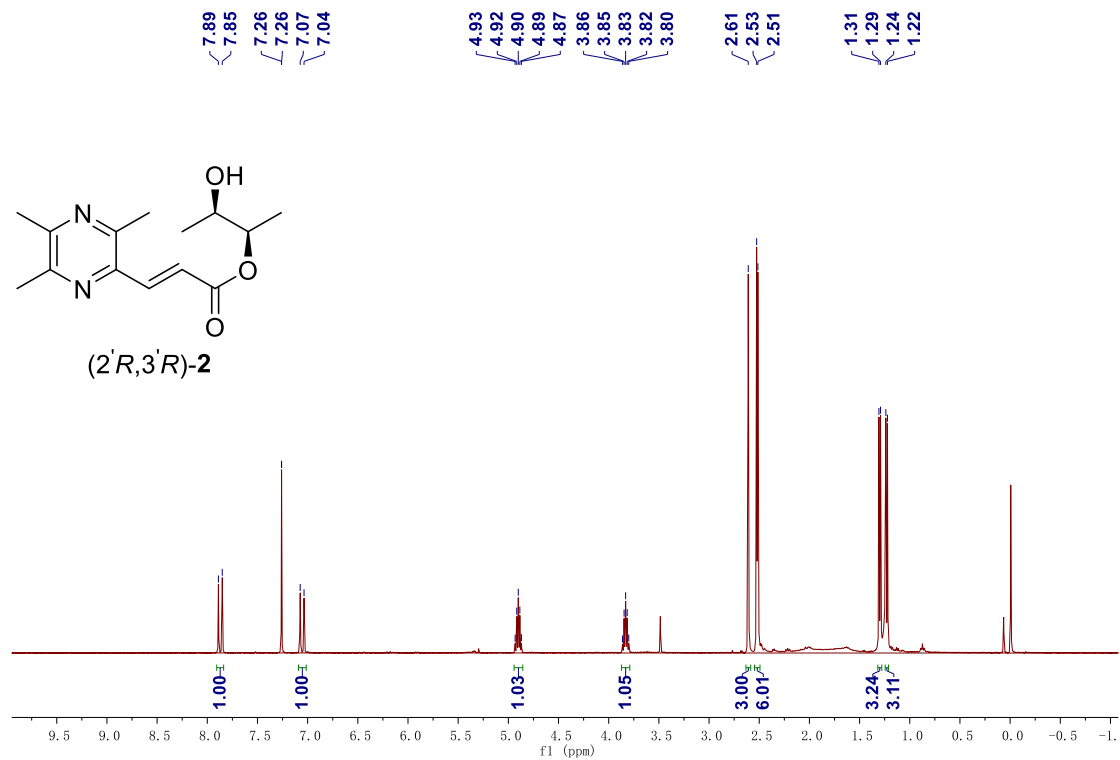



**Figure S45.**  $^{13}\text{C}$  NMR spectra of (2'*R*,3'*R*)-2 (100MHz, Chloroform-*d*)

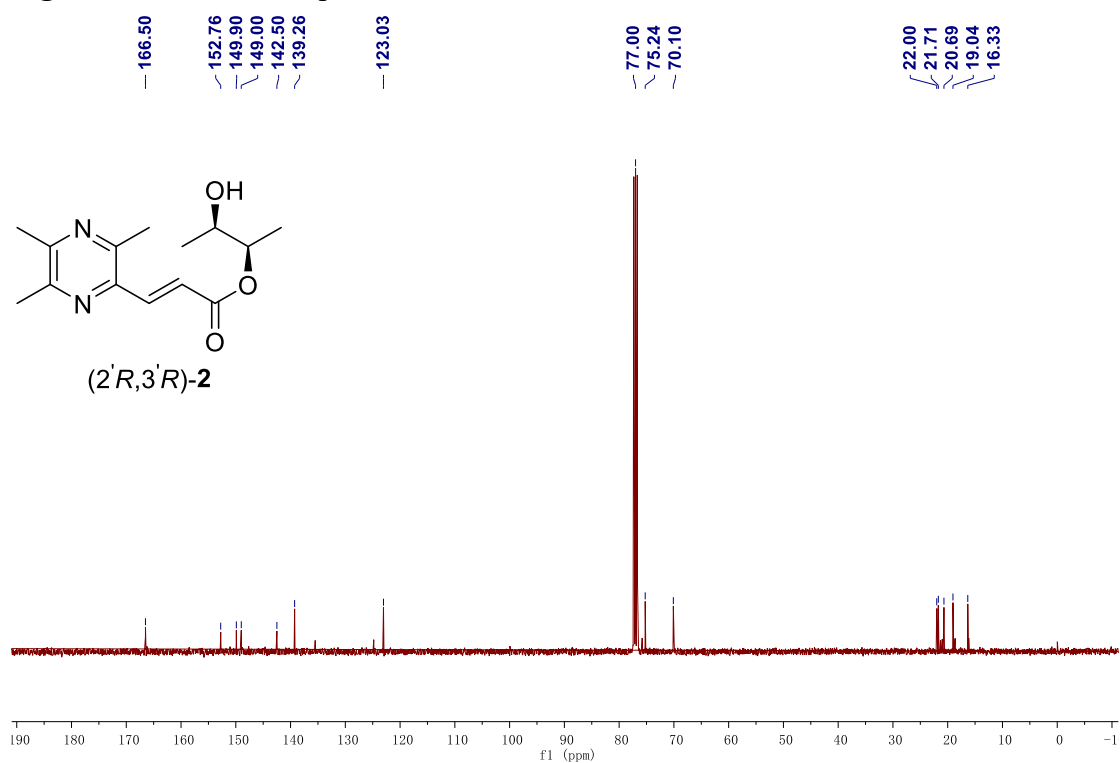

**Figure S46.**  $^1\text{H}$ - $^1\text{H}$  COSY spectrum of (2'*R*,3'*R*)-2 (Chloroform-*d*)

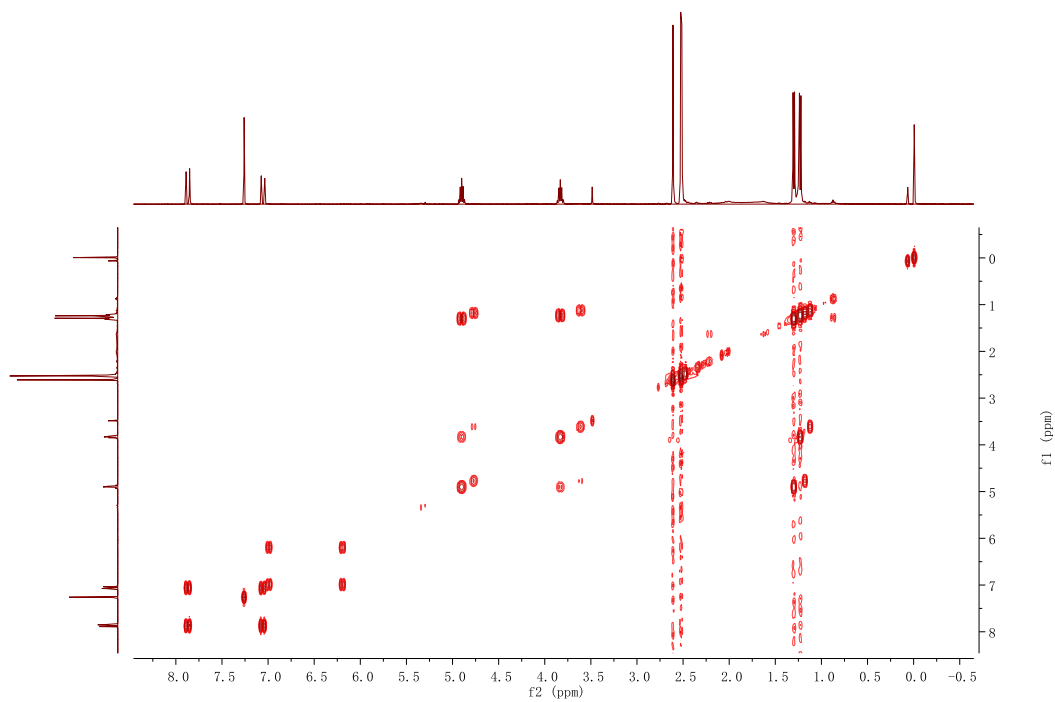

**Figure S47.** HSQC spectrum of (2'*R*,3'*R*)-2 (Chloroform-*d*)

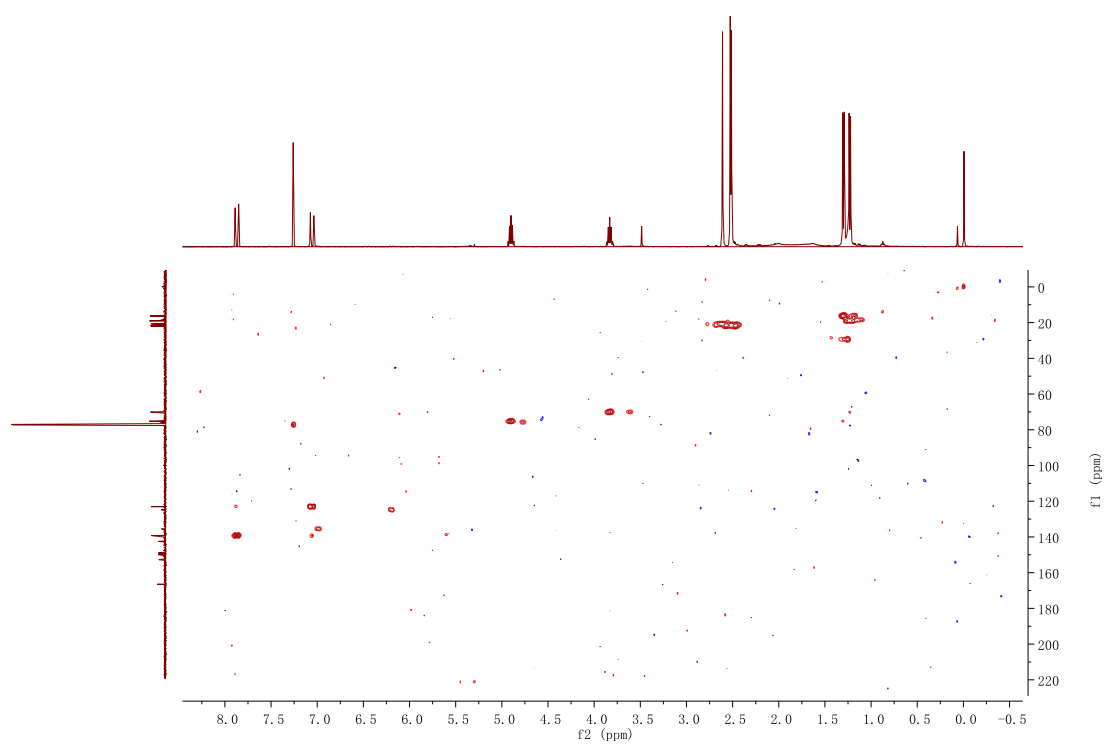

**Figure S48.** HMBC spectrum of (2'*R*,3'*R*)-2 (Chloroform-*d*)

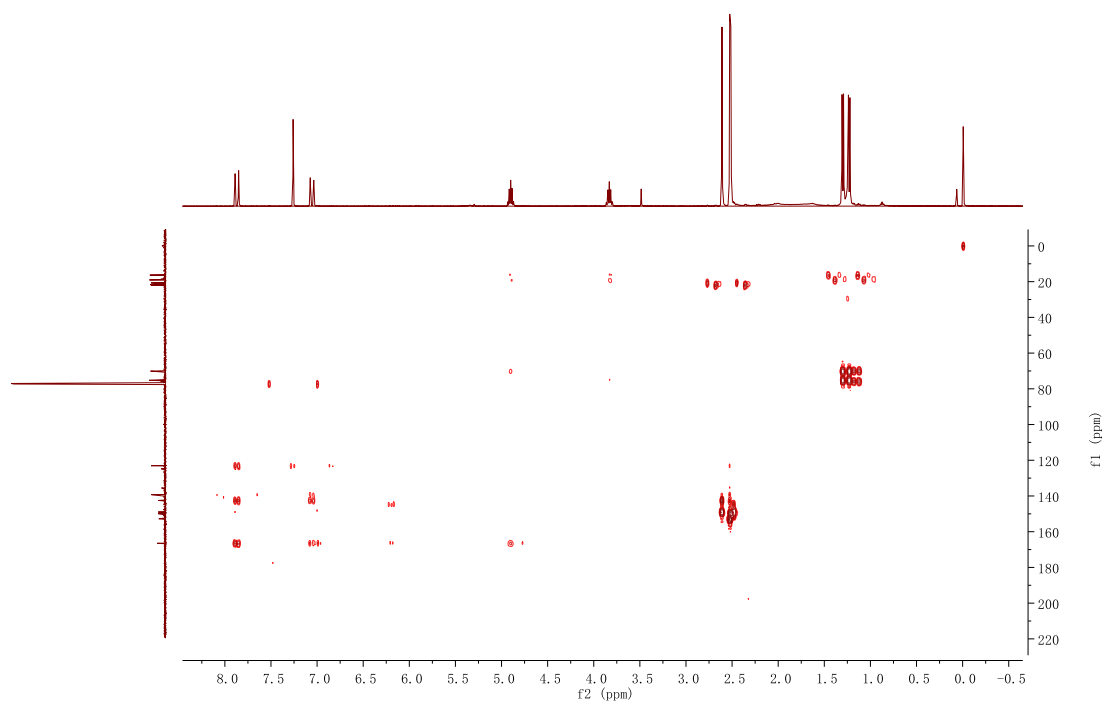

Figure S49. NOESY spectrum of (2'R,3'R)-2 (Chloroform-d)

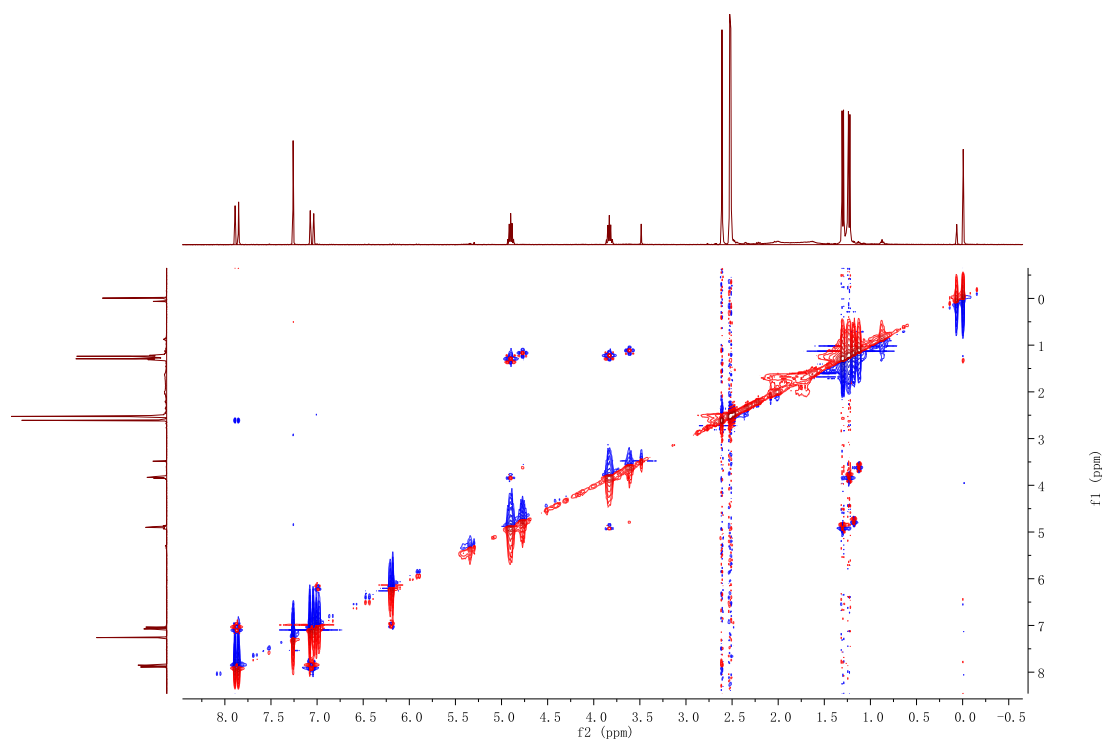

Figure S50. <sup>1</sup>H NMR spectra of (2'S,3'S)-2 (400MHz, Chloroform-d)

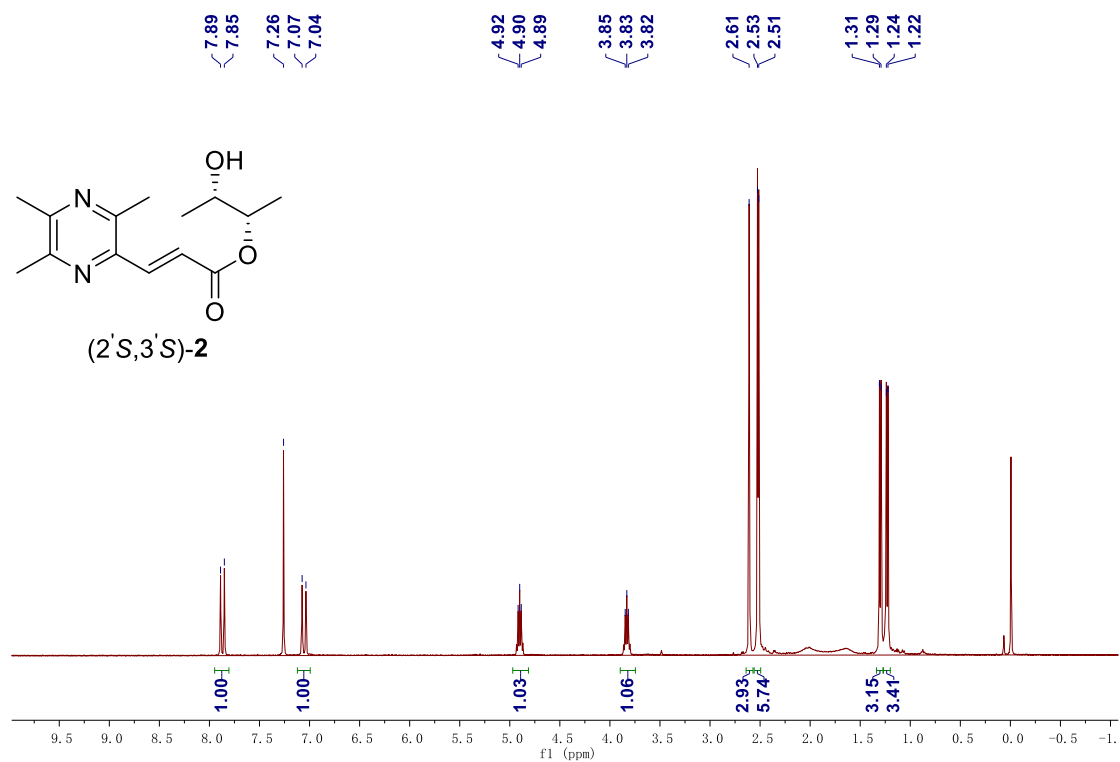

**Figure S51.**  $^{13}\text{C}$  NMR spectra of (2'S,3'S)-2 (100MHz, Chloroform-*d*)

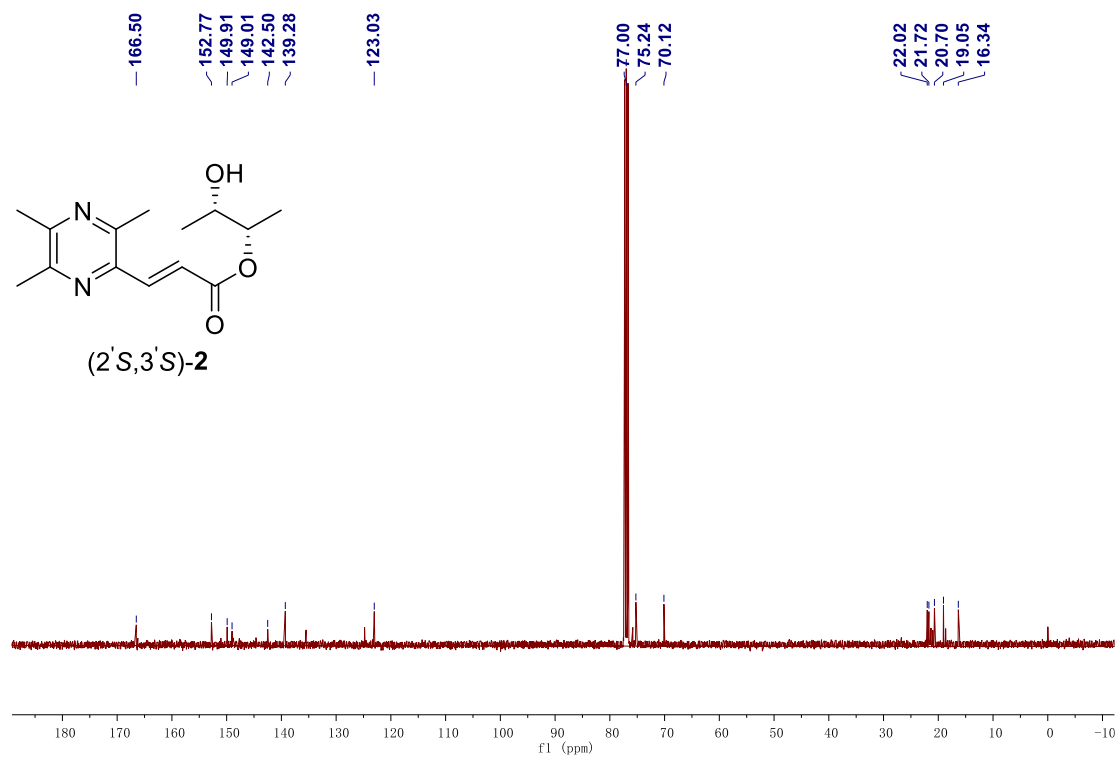

**Figure S52.**  $^1\text{H}$ - $^1\text{H}$  COSY spectrum of (2'S,3'S)-2 (Chloroform-*d*)

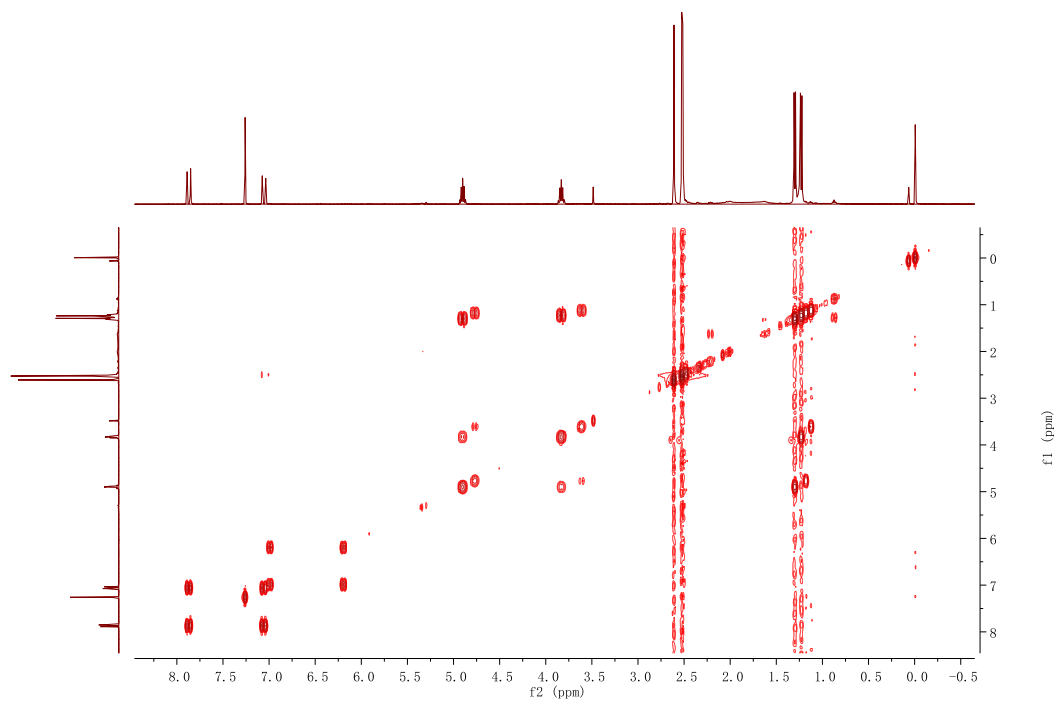

**Figure S53.** HSQC spectrum of (2'*S*,3'*S*)-**2** (Chloroform-*d*)

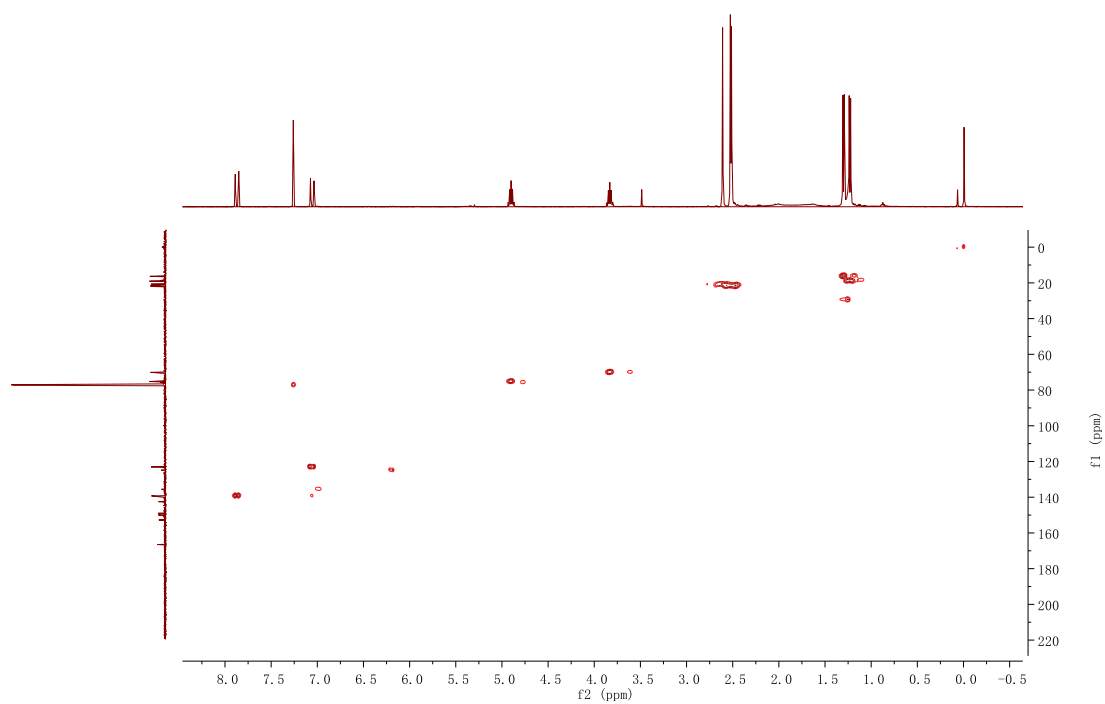

**Figure S54.** HMBC spectrum of (2'*S*,3'*S*)-**2** (Chloroform-*d*)

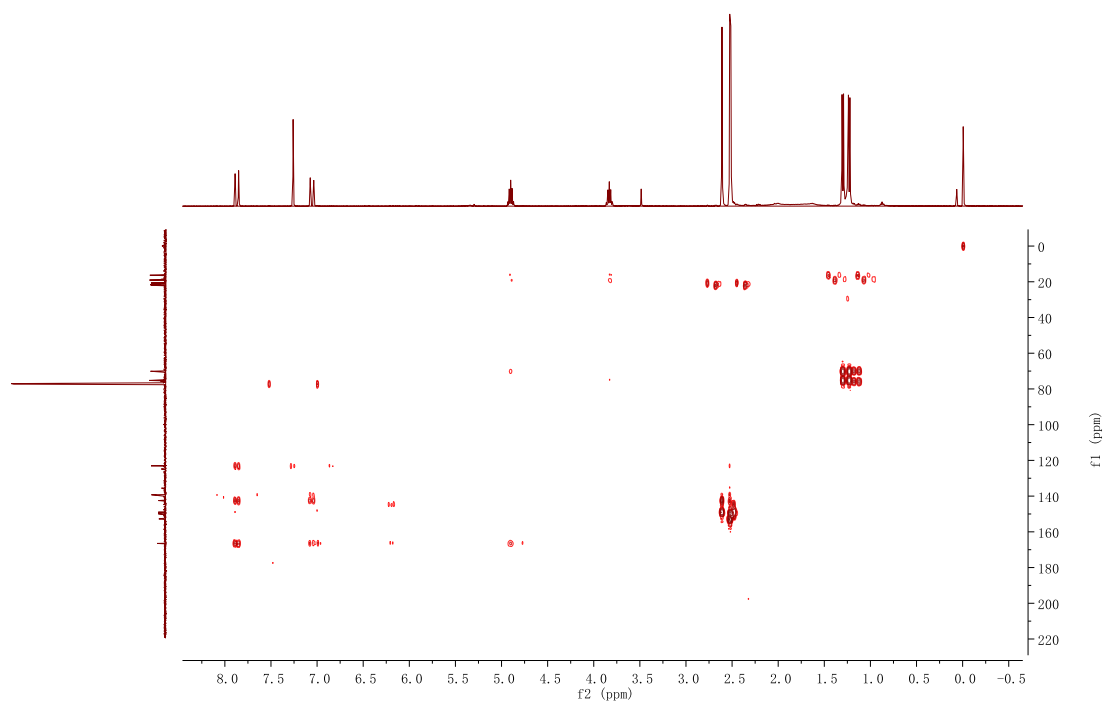

**Figure S55.** NOESY spectrum of (2'*S*,3'*S*)-**2** (Chloroform-*d*)

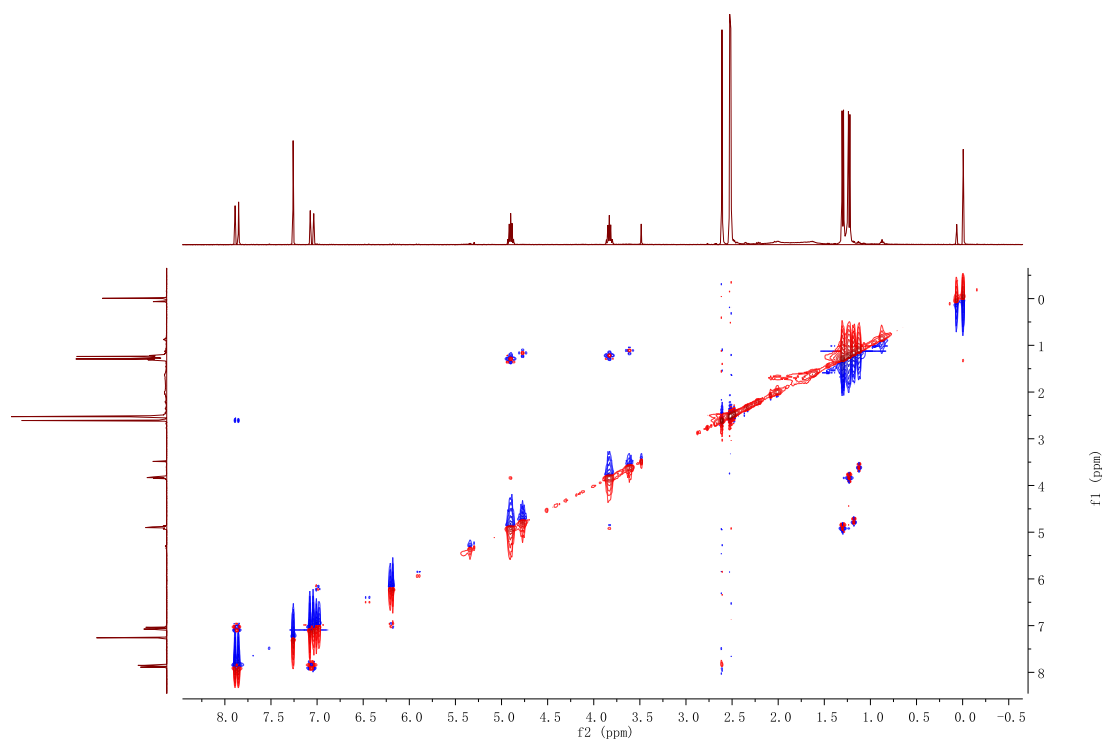

**Figure S56.** <sup>1</sup>H NMR spectra of (2'*R*,3'*S*)-**3** and (2'*S*,3'*R*)-**3** (400MHz, Chloroform-*d*)

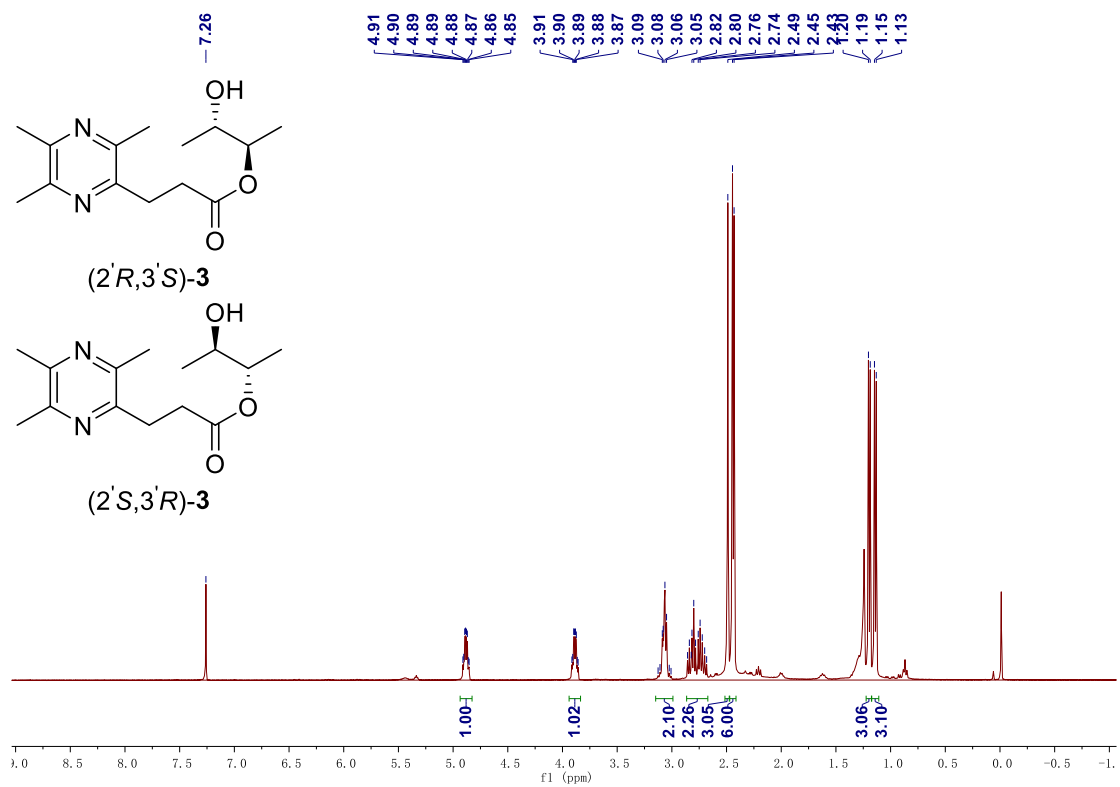

**Figure S57.**  $^{13}\text{C}$  NMR spectra of (2'*R*,3'*S*)-**3** and (2'*S*,3'*R*)-**3** (100MHz, Chloroform-*d*)

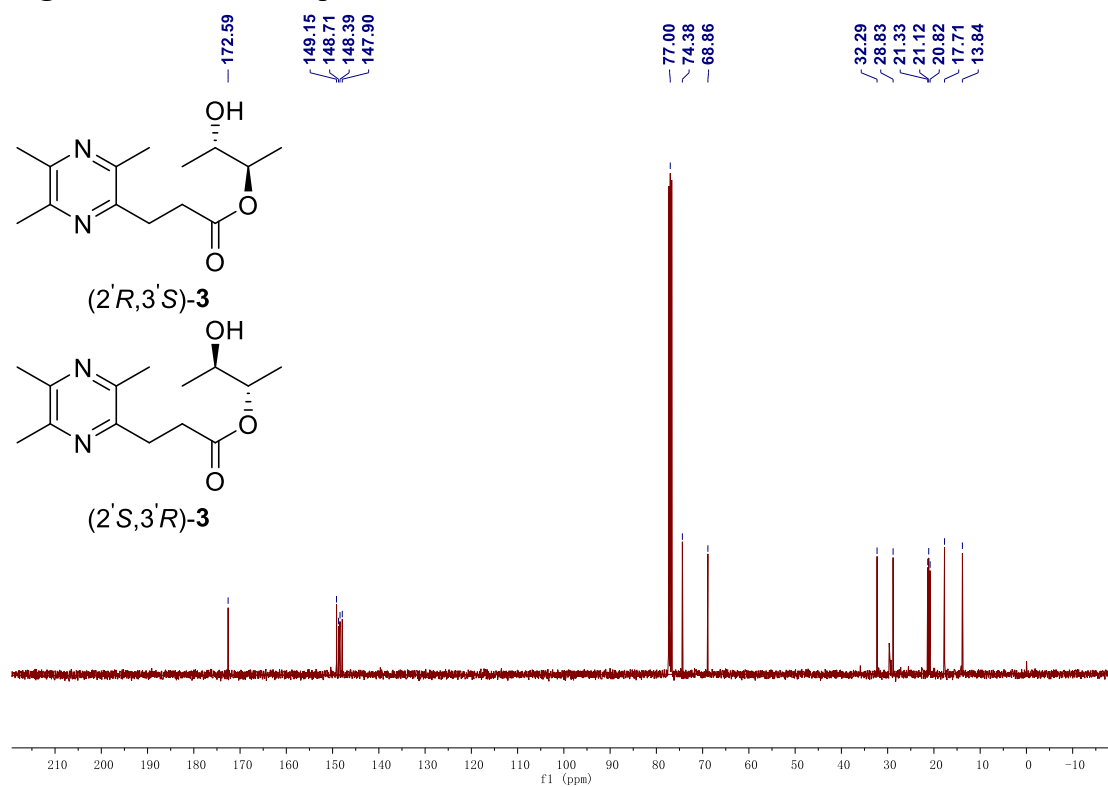

**Figure S58.**  $^1\text{H}$  NMR spectra of (2'*R*,3'*R*)-**3** (400MHz, Chloroform-*d*)

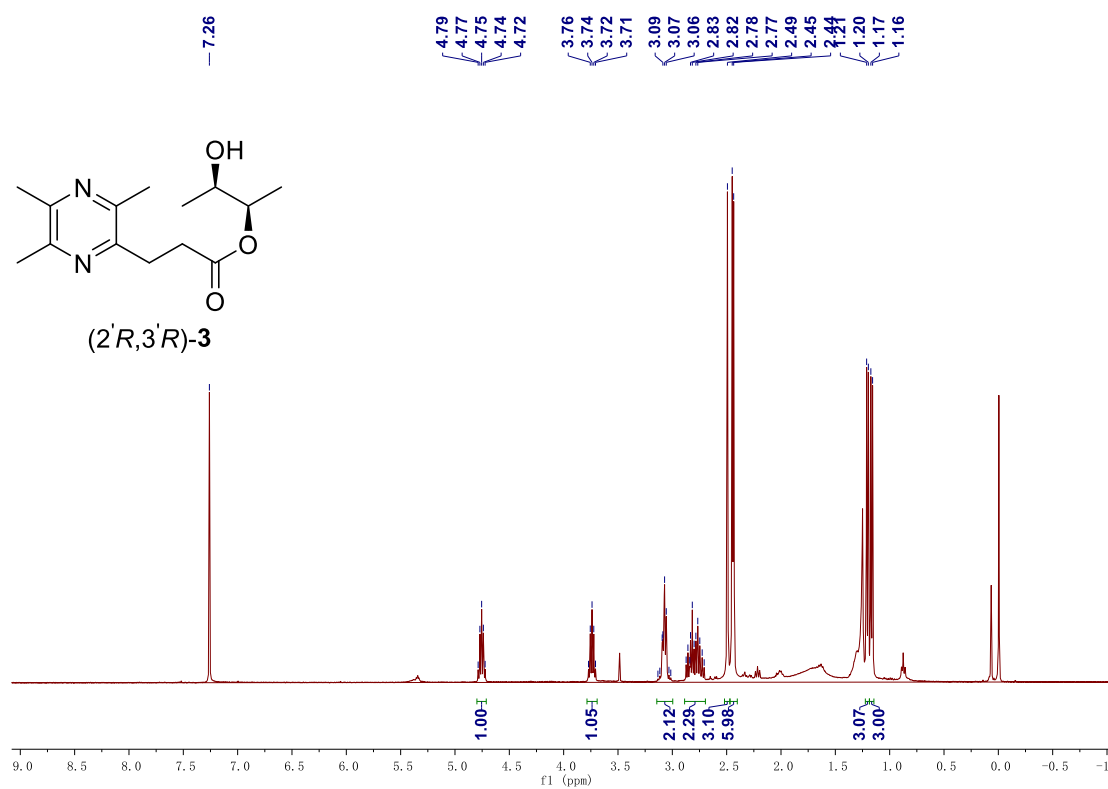

**Figure S59.**  $^{13}\text{C}$  NMR spectra of (2'R,3'R)-3 (100MHz, Chloroform-d)

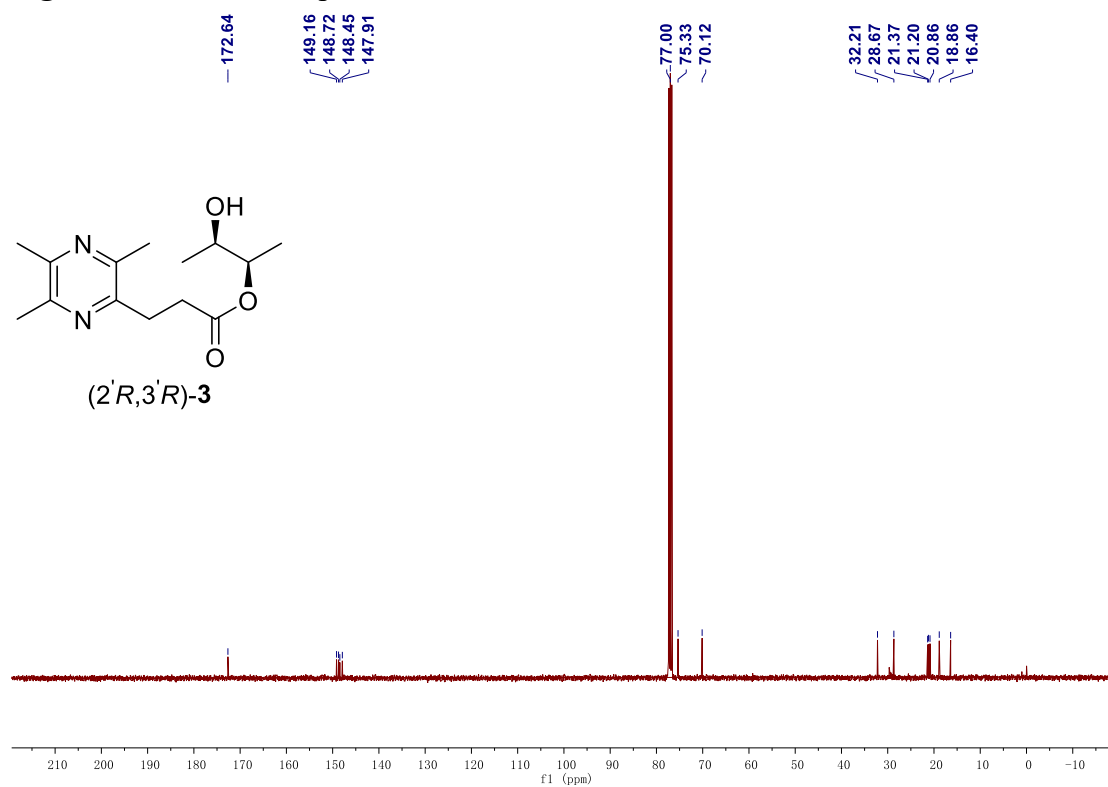

**Figure S60.**  $^1\text{H}$  NMR spectra of (2'S,3'S)-3 (400MHz, Chloroform-d)

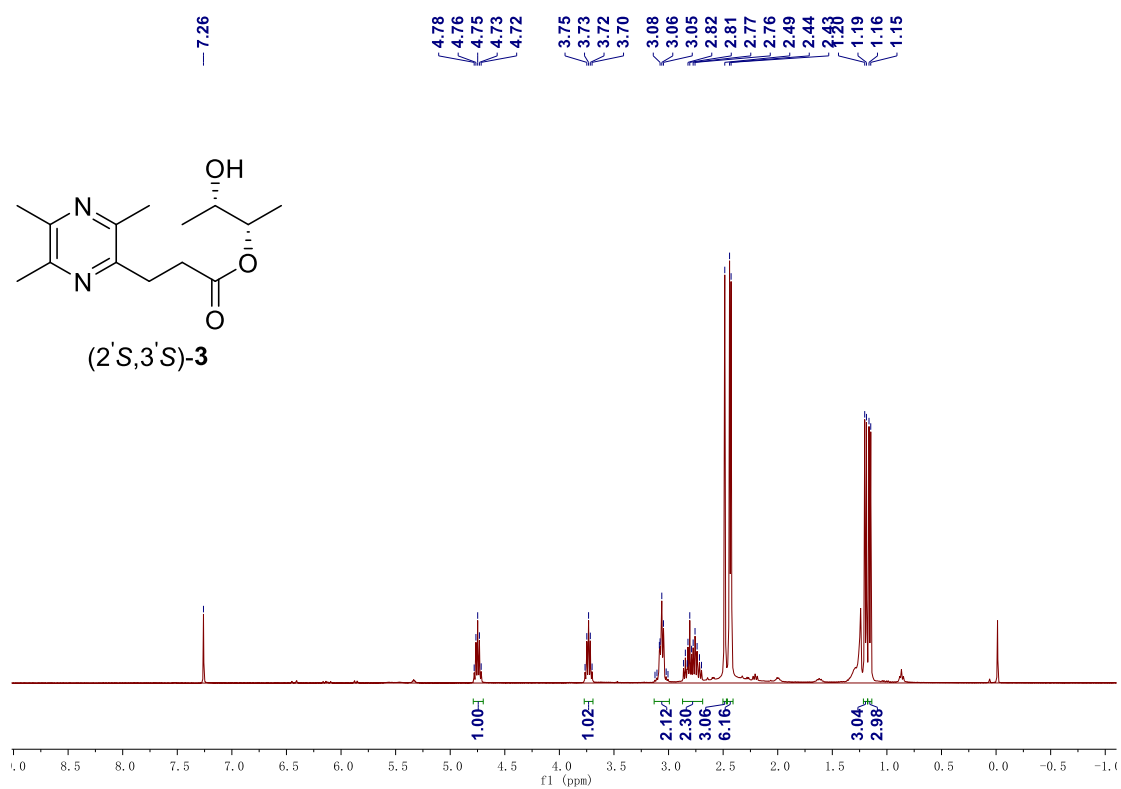



Figure S61.  $^{13}\text{C}$  NMR spectra of (2'S,3'S)-3 (100MHz, Chloroform-*d*)

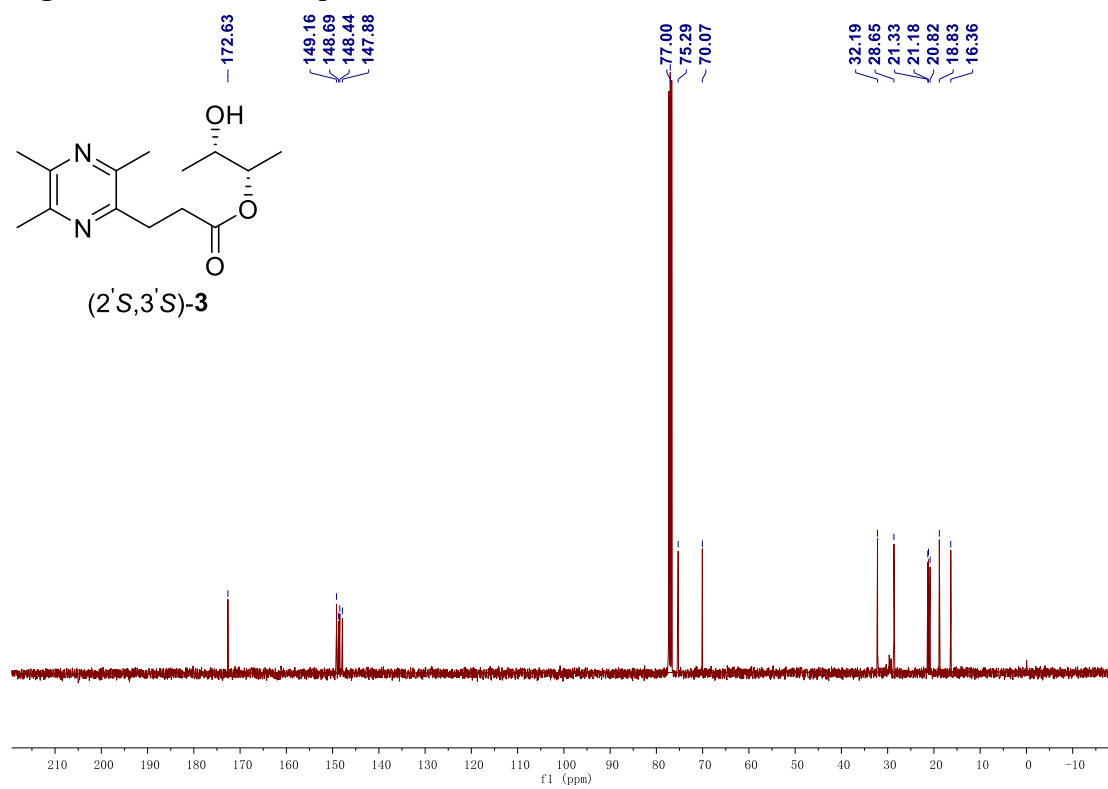

### HPLC Traces of natural compound 2 and 3

Analysis of natural **2** was performed on an Agilent 1220 infinity (Chiralpak IG column, 5  $\mu$ m, 4.6  $\times$  250 mm, MeCN: H<sub>2</sub>O= 100:0, 1.0 mL/min, t<sub>1</sub>= 7.140 min, t<sub>2</sub>=17.717 min).

**Figure S62.** Natural **2** HPLC traces

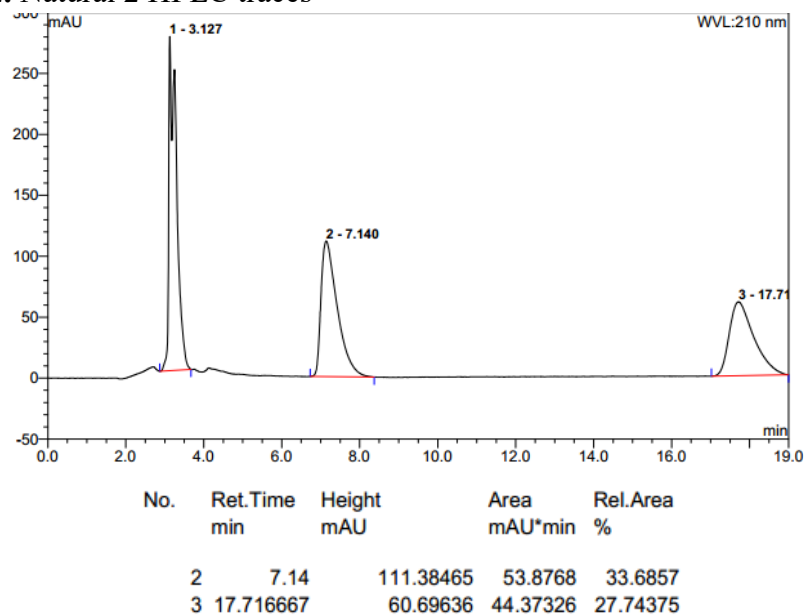

Analysis of natural **3** was performed on an Agilent 1220 infinity (Chiralpak IG column, 5  $\mu$ m, 4.6  $\times$  250 mm, MeCN: H<sub>2</sub>O= 100:0, 1.0 mL/min, t<sub>1</sub>= 6.707 min, t<sub>2</sub>=9.837 min).

**Figure S63.** Natural **3** HPLC traces

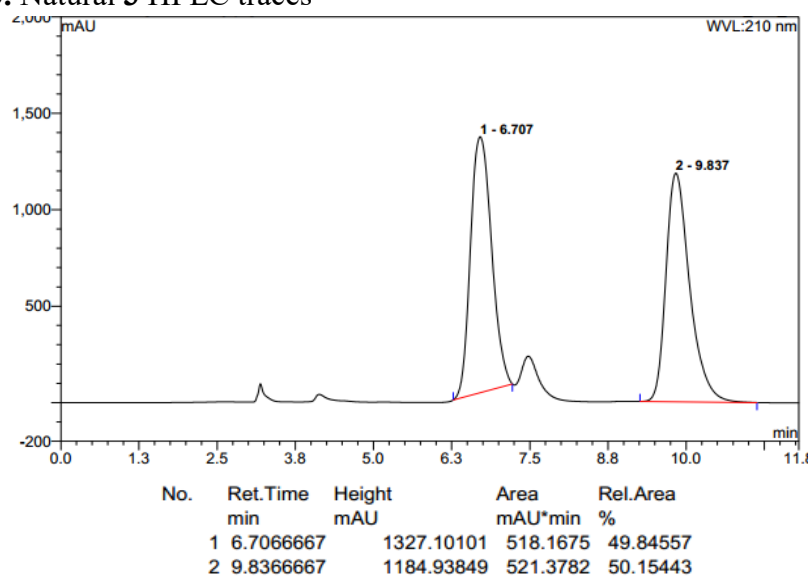

### HPLC Traces of four isomers of compound 4, 2 and 3

Analysis and Semi-prep of (2'*S*,3'*S*)-4 and (2'*R*,3'*S*)-4 was performed on an Agilent 1220 infinity (Chiralpak IG column, 5  $\mu$ m, 4.6  $\times$  250 mm, MeOH: H<sub>2</sub>O= 85:15, 1.0 mL/min,  $t_1$  = 19.357 min,  $t_2$  = 23.750 min).

**Figure S64.** (2'*S*,3'*S*)-4 and (2'*R*,3'*S*)-4 HPLC traces

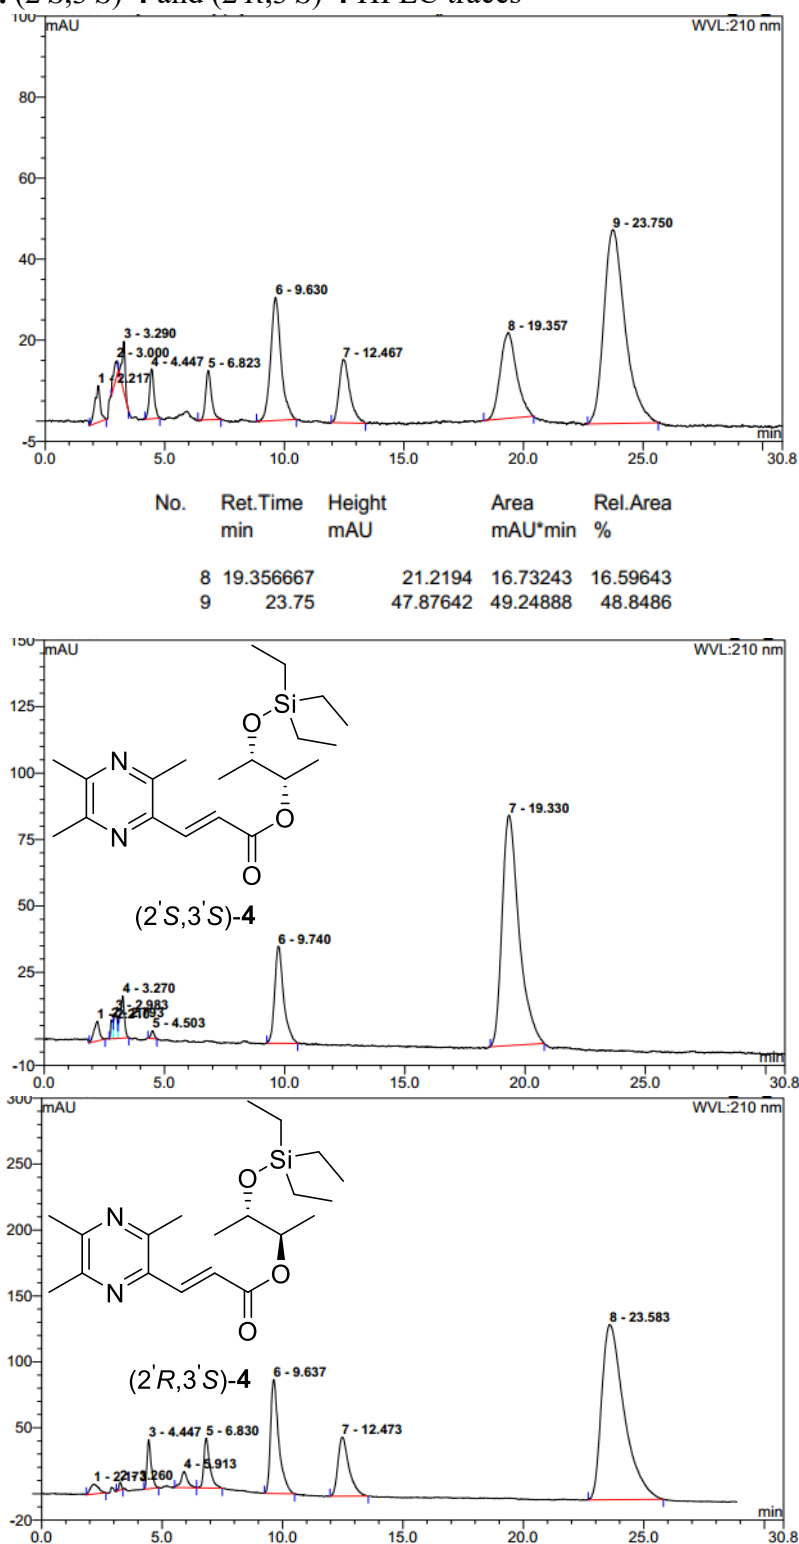

Analysis and Semi-prep of (2'*S*,3'*R*)-**4** and (2'*R*,3'*R*)-**4** was performed on an Agilent 1220 infinity (Chiralpak IG column, 5  $\mu$ m, 4.6  $\times$  250 mm, MeOH: H<sub>2</sub>O= 85:15, 1.0 mL/min,  $t_1$  = 18.943 min,  $t_2$  = 21.657 min).

**Figure S65.** (2'*S*,3'*R*)-**4** and (2'*R*,3'*R*)-**4** HPLC traces

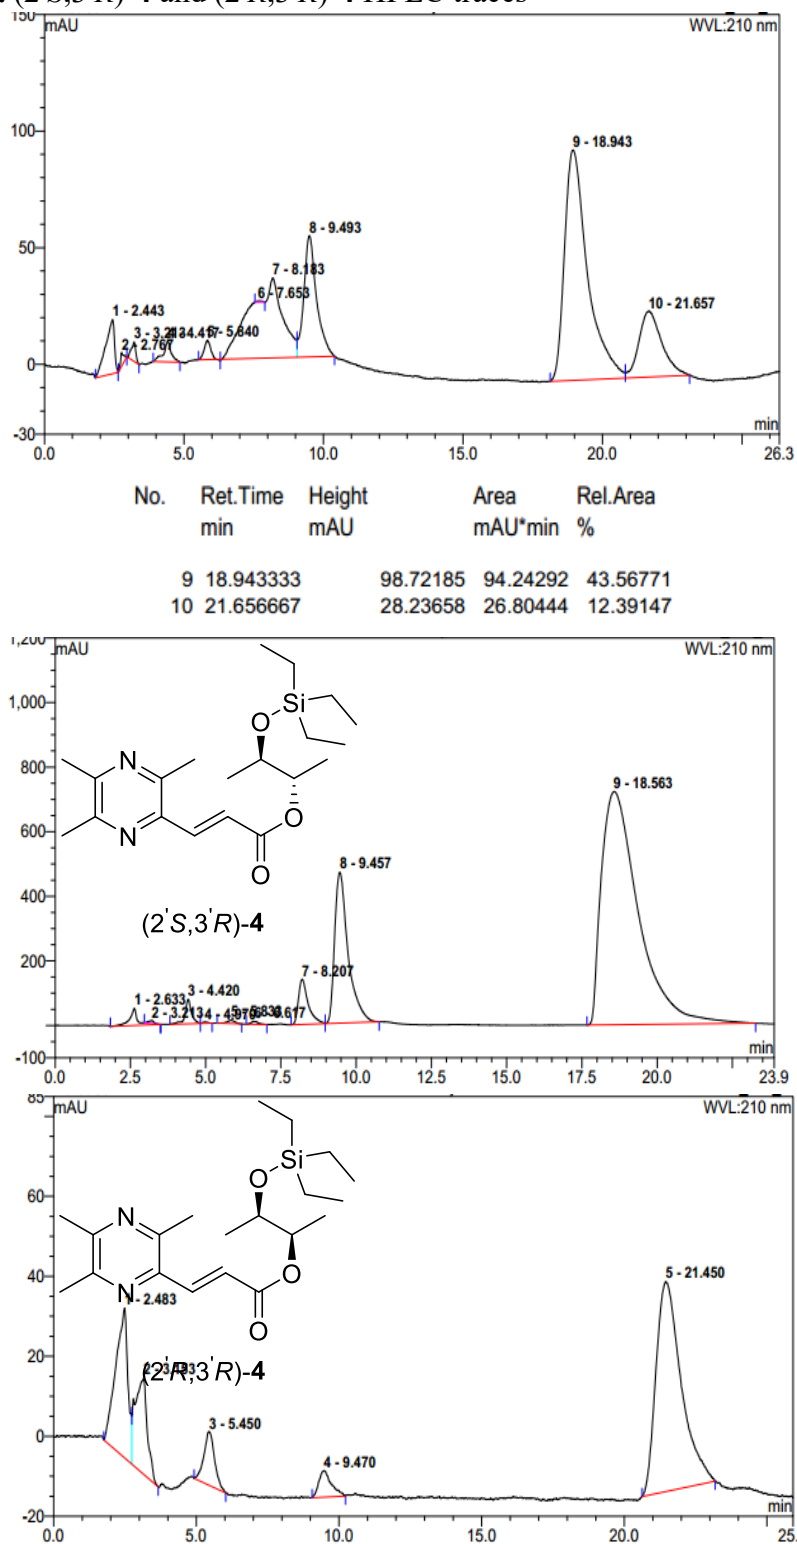

Analysis and Semi-prep of (2'*R*,3'*S*)-**2** and (2'*S*,3'*R*)-**2** was performed on an Agilent 1220 infinity (Chiralpak IG column, 5  $\mu$ m, 4.6  $\times$  250 mm, MeCN: H<sub>2</sub>O= 100:0, 1.0 mL/min,  $t_1 = 7.117$  min,  $t_2 = 17.767$  min).

**Figure S66.** (2'*R*,3'*S*)-**2** and (2'*S*,3'*R*)-**2** HPLC traces

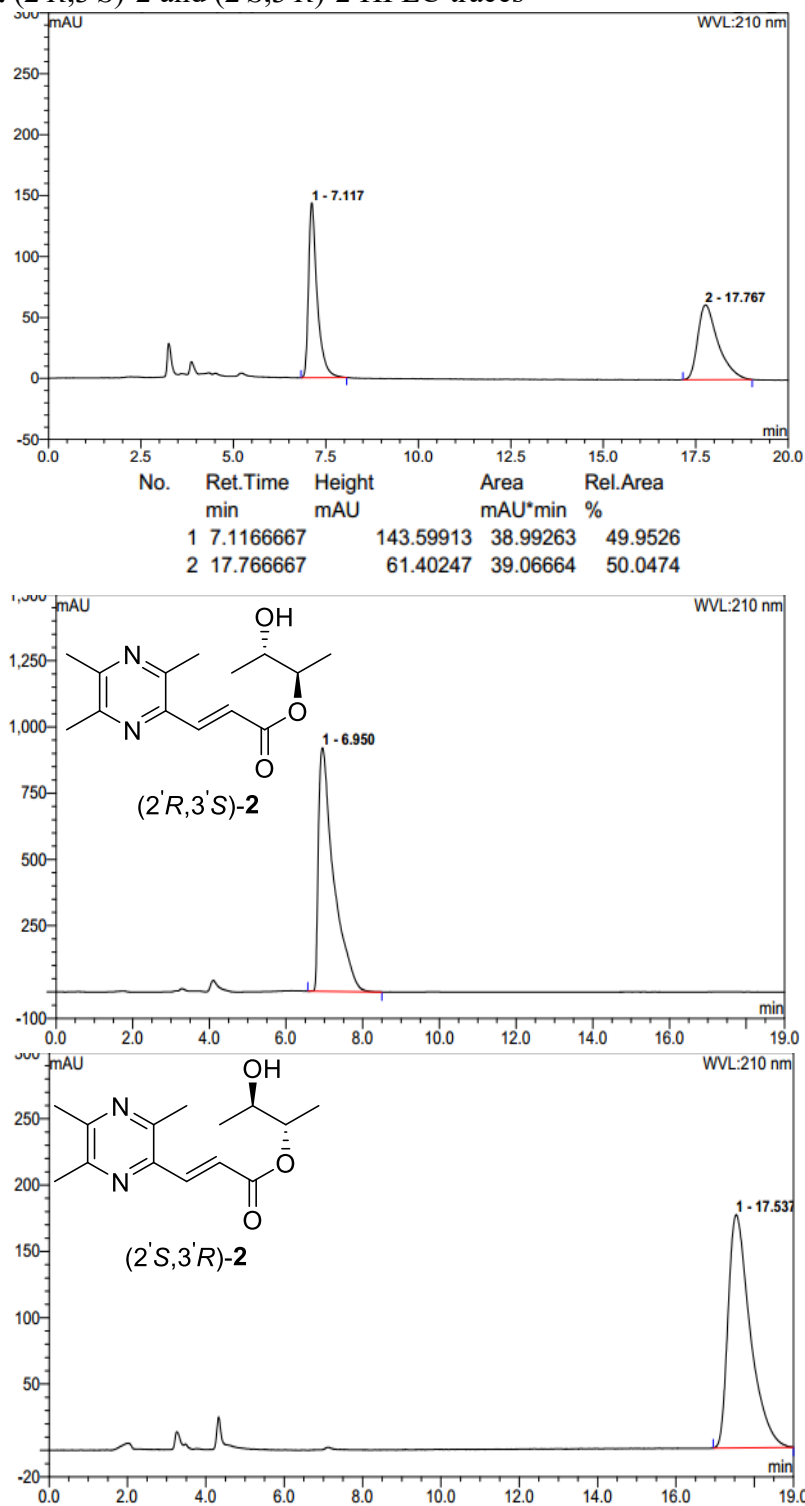

Analysis and Semi-prep of (2'S,3'S)-**2** was performed on an Agilent 1220 infinity (Chiralpak IG column, 5  $\mu$ m, 4.6  $\times$  250 mm, MeCN: H<sub>2</sub>O= 100:0, 1.0 mL/min, t = 8.827 min).

**Figure S67.** (2'S,3'S)-**2** HPLC traces

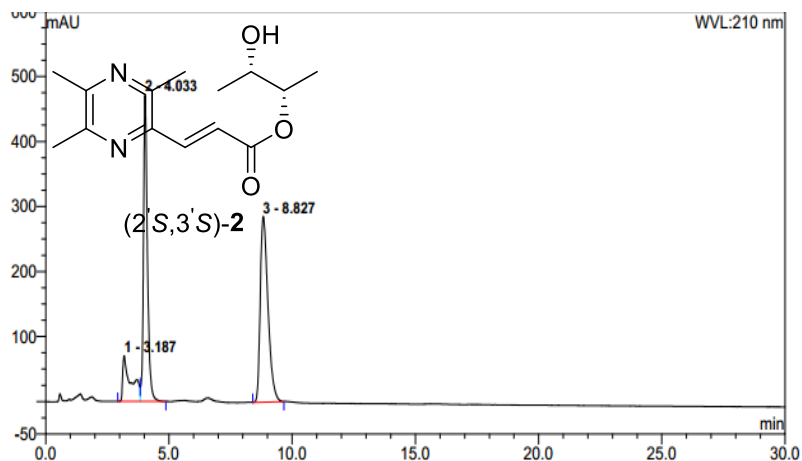

Analysis and Semi-prep of (2'R,3'R)-**2** was performed on an Agilent 1220 infinity (Chiralpak IG column, 5  $\mu$ m, 4.6  $\times$  250 mm, MeCN: H<sub>2</sub>O= 100:0, 1.0 mL/min, t = 13.573 min).

**Figure S68.** (2'R,3'R)-**2** HPLC traces

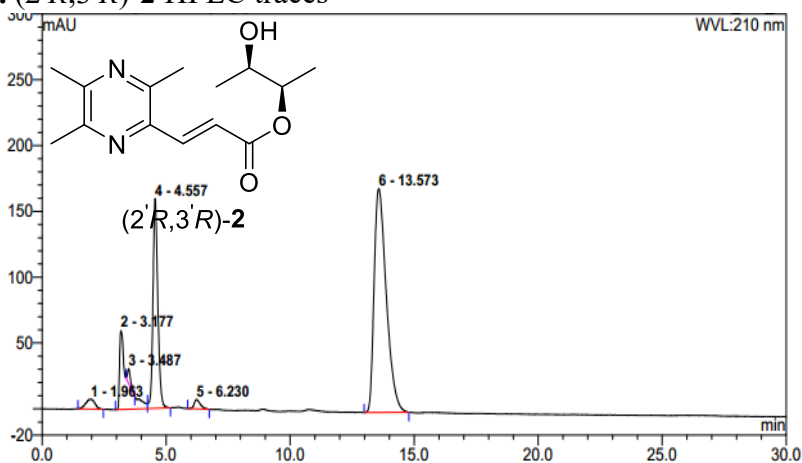

Analysis and Semi-prep of (2'*R*,3'*S*)-**3** and (2'*S*,3'*R*)-**3** was performed on an Agilent 1220 infinity (Chiralpak IG column, 5  $\mu$ m, 4.6  $\times$  250 mm, MeCN: H<sub>2</sub>O= 100:0, 1.0 mL/min,  $t_1$  = 6.750 min,  $t_2$  = 9.967 min).

**Figure S69.** (2'*R*,3'*S*)-**3** and (2'*S*,3'*R*)-**3** HPLC traces

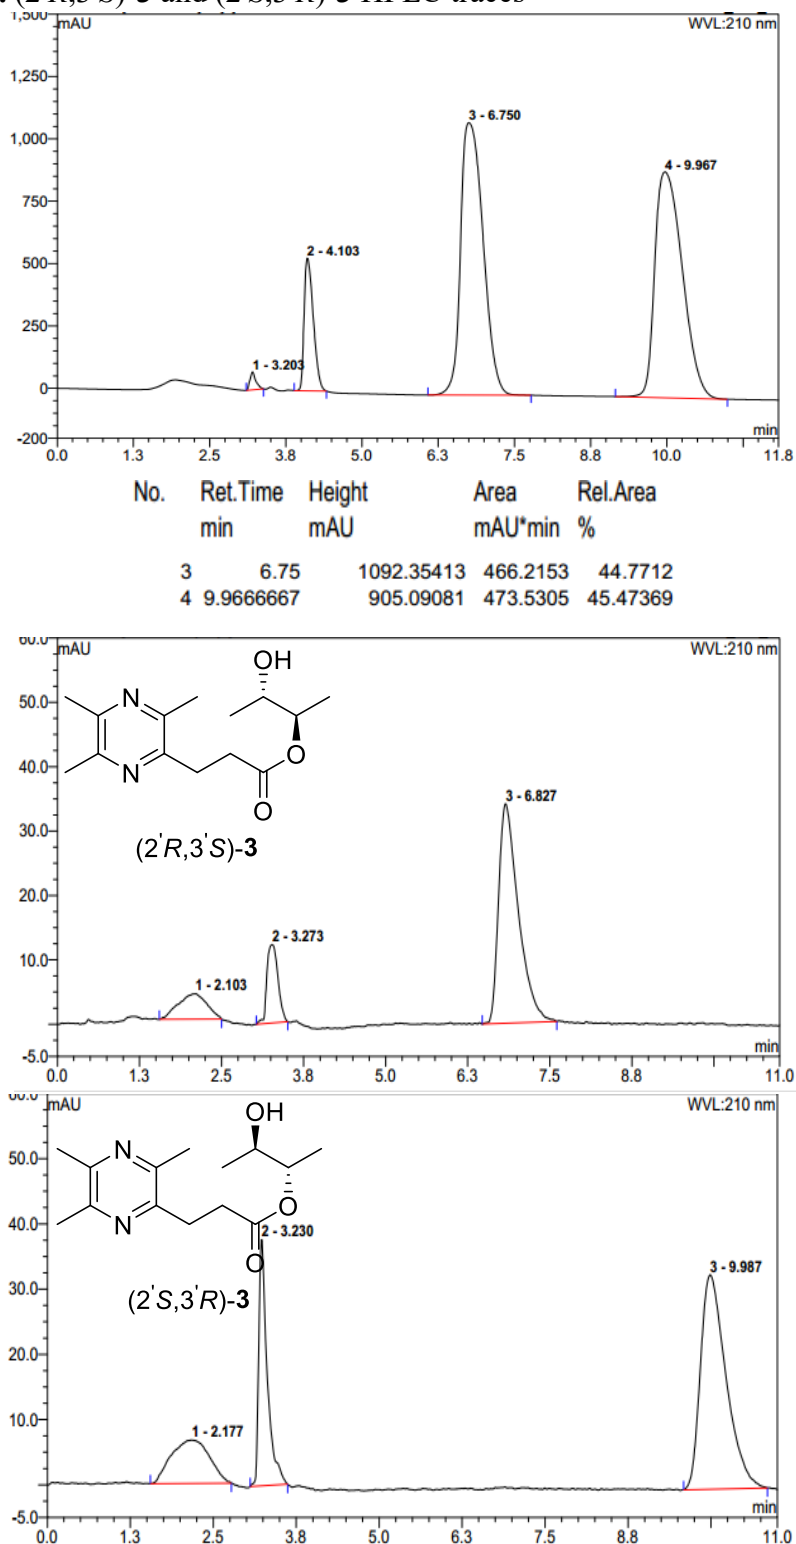

Analysis and Semi-prep of (2'*S*,3'*S*)-**3** was performed on an Agilent 1220 infinity (Chiralpak IG column, 5  $\mu$ m, 4.6  $\times$  250 mm, MeCN: H<sub>2</sub>O= 100:0, 1.0 mL/min, t = 6.633 min).

**Figure S70.** (2'*S*,3'*S*)-**3** HPLC traces

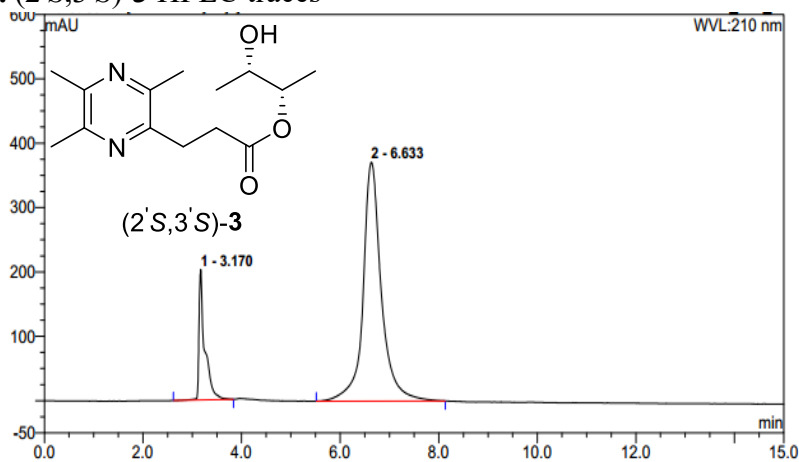

Analysis and Semi-prep of (2'*R*,3'*R*)-**3** was performed on an Agilent 1220 infinity (Chiralpak IG column, 5  $\mu$ m, 5  $\times$  250 mm, MeCN: H<sub>2</sub>O= 100:0, 1.0 mL/min, t = 7.640 min).

**Figure S71.** (2'*R*,3'*R*)-**3** HPLC traces

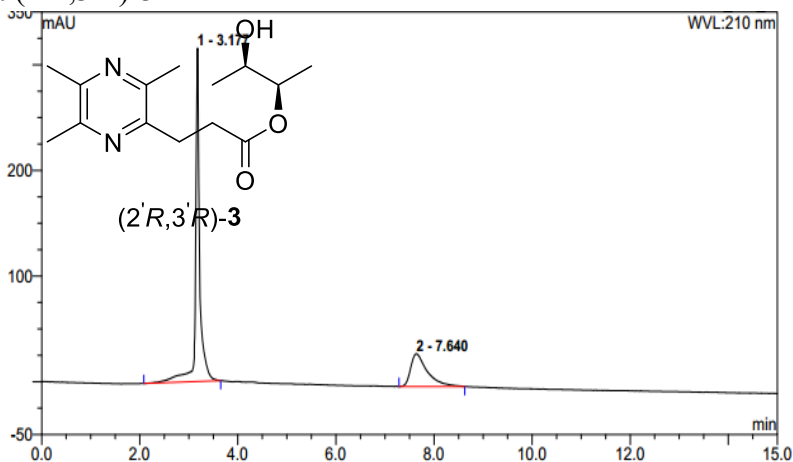

Supplement: d0qo01030h1.pdf [file d0qo01030h1.pdf]
